# Supplementary material for: The cost-effectiveness of COVID-19 vaccination program among age-groups children, adults, and elderly in Europe: A systematic review
Source: PubMed Central journal article supplement (PMC11615606; doi:10.1016/j.jvacx.2024.100580), 2024-11-08
Supplement: mmc1.pdf [file mmc1.pdf]

Appendix 1.

Embase via GU library website (09 February 2023)

Title: The economic evaluation and cost benefit analysis for COVID-19 vaccination

| Search terms                                            | Items found                                                                                                                                                                                                                                                                                                                                                                                                                                                                                        |           |
|---------------------------------------------------------|----------------------------------------------------------------------------------------------------------------------------------------------------------------------------------------------------------------------------------------------------------------------------------------------------------------------------------------------------------------------------------------------------------------------------------------------------------------------------------------------------|-----------|
| Population: COVID-19 <sup>1)</sup>                      |                                                                                                                                                                                                                                                                                                                                                                                                                                                                                                    |           |
| 1                                                       | 'coronavirus disease 2019'/de                                                                                                                                                                                                                                                                                                                                                                                                                                                                      | 289,118   |
| 2                                                       | (COVID* or sars cov* or sarscov* or corona virus or coronavirus or ncov):ti,ab,kw                                                                                                                                                                                                                                                                                                                                                                                                                  | 148,431   |
| 3                                                       | 1 or 2                                                                                                                                                                                                                                                                                                                                                                                                                                                                                             | 336,775   |
| Intervention: Vaccination                               |                                                                                                                                                                                                                                                                                                                                                                                                                                                                                                    |           |
| 4                                                       | Vaccine                                                                                                                                                                                                                                                                                                                                                                                                                                                                                            | 513,857   |
| 5                                                       | Vaccination                                                                                                                                                                                                                                                                                                                                                                                                                                                                                        | 313,661   |
| 6                                                       | Vaccin                                                                                                                                                                                                                                                                                                                                                                                                                                                                                             | 2,159     |
| 7                                                       | Immunization                                                                                                                                                                                                                                                                                                                                                                                                                                                                                       | 217,680   |
| 8                                                       | 4 or 5 or 6 or 7                                                                                                                                                                                                                                                                                                                                                                                                                                                                                   | 689,691   |
| Health economic aspects /Economic aspects <sup>2)</sup> |                                                                                                                                                                                                                                                                                                                                                                                                                                                                                                    |           |
| 9                                                       | ('health economics'/de OR 'economic evaluation'/exp OR 'health care cost'/exp OR 'pharmacoeconomics'/exp OR econom*:ab,ti OR cost:ab,ti OR costs:ab,ti OR costly:ab,ti OR costing:ab,ti OR price:ab,ti OR prices:ab,ti OR pricing:ab,ti OR pharmacoeconomic*:ab,ti OR (expenditure*:ti,ab NOT energy:ti,ab) OR ((value NEXT/2 money):ab,ti) OR budget*:ab,ti) NOT (((metabolic NEXT/2 cost):ab,ti) OR (((energy OR oxygen) NEXT/2 cost):ab,ti) OR (((energy OR oxygen) NEAR/2 expenditure):ab,ti)) | 1,741,771 |
| Combined sets                                           |                                                                                                                                                                                                                                                                                                                                                                                                                                                                                                    |           |
| 10                                                      | 3 and 8 and 9                                                                                                                                                                                                                                                                                                                                                                                                                                                                                      | 5,094     |
| Health economic aspects /Economic aspects <sup>2)</sup> |                                                                                                                                                                                                                                                                                                                                                                                                                                                                                                    |           |
| 11                                                      | 'economics'/mj                                                                                                                                                                                                                                                                                                                                                                                                                                                                                     | 28,749    |
| 12                                                      | 'cost'/exp/mj                                                                                                                                                                                                                                                                                                                                                                                                                                                                                      | 90,454    |
| 13                                                      | economic NEAR/2 model*                                                                                                                                                                                                                                                                                                                                                                                                                                                                             | 9,696     |
| 14                                                      | 'cost minimi*':ti,ab,kw OR 'cost utilit*':ti,ab,kw OR 'health utilit*':ti,ab,kw OR 'economic evaluation*':ti,ab,kw OR 'economic review*':ti,ab,kw OR 'cost outcome':ti,ab,kw OR 'cost analys\$s':ti,ab,kw OR 'economic analys\$s':ti,ab,kw OR 'budget* impact analys\$s':ti,ab,kw                                                                                                                                                                                                                  | 62,139    |
| 15                                                      | 'cost effective*':ti,kw OR pharmacoeconomic*:ti,kw OR 'pharmaco economic*':ti,kw OR 'cost benefit':ti,kw OR costs:ti,kw                                                                                                                                                                                                                                                                                                                                                                            | 126,148   |
| 16                                                      | 'life year':ab,kw OR 'life years':ab,kw OR qaly*:ab,kw OR 'cost-benefit analys\$s':ab,kw OR 'cost-effectiveness analys\$s':ab,kw                                                                                                                                                                                                                                                                                                                                                                   | 58,592    |

|                                                         |                                                                                                |         |
|---------------------------------------------------------|------------------------------------------------------------------------------------------------|---------|
| 17                                                      | (cost:ti,kw OR economic*:ti,kw) AND (costs:ab OR 'cost effectiveness':ab OR markov:ab)         | 109,515 |
| 18                                                      | 11 or 12 or 13 or 14 or 15 or 16 or 17                                                         | 301,500 |
| Combined sets                                           |                                                                                                |         |
| 19                                                      | 3 and 8 and 18                                                                                 | 329     |
| Health economic aspects /Economic aspects <sup>2)</sup> |                                                                                                |         |
| 20                                                      | (cost\$ NEAR/2 (illness OR disease OR sickness)):ti,ab                                         | 7,497   |
| 21                                                      | (burden\$ NEAR/2 (illness OR disease\$ OR condition\$ OR economic*)):ti,ab                     | 81,378  |
| 22                                                      | 'quality-adjusted life years':ti,ab OR 'quality adjusted life years':ti,ab OR qaly\$:ti,ab     | 28,422  |
| 23                                                      | 'quality adjusted life year'/de                                                                | 33,538  |
| 24                                                      | 'cost of illness'/de                                                                           | 20,887  |
| 25                                                      | 'health care cost'/exp                                                                         | 332,392 |
| 26                                                      | ('out of pocket' NEAR/2 (payment\$ OR expenditure\$ OR cost\$ OR spending OR expense\$)):ti,ab | 9,175   |
| 27                                                      | (expenditure\$ NEAR/3 (health OR direct OR indirect)):ti,ab                                    | 13,798  |
| 28                                                      | ((adjusted OR 'quality adjusted') NEAR/2 year\$):ti,ab                                         | 39,741  |
| 29                                                      | 20 or 21 or 22 or 23 or 24 or 25 or 26 or 27 or 28                                             | 458,639 |
| Combined sets                                           |                                                                                                |         |
| 30                                                      | 3 and 8 and 29                                                                                 | 1,414   |
| 31                                                      | 10 or 19 or 30                                                                                 | 5,425   |

- 1) [COVID-19 and pregnancy \(sbu.se\)](#)
- 2) [Bilaga 1 Sökdokumentation \(sbu.se\)](#)

/de= Term from the EMTREE controlled vocabulary

/exp= Includes terms found below this term in the EMTREE hierarchy

/mj = Major Topic

:ab = Abstract

:au = Author

:ti = Article Title

:ti:ab = Title or abstract

\* = Truncation

“ “ = Citation Marks; searches for an exact phrase

NEAR/x = Requests terms that are within 'x' words of each other in either direction

## COCHRANE

Cochrane via Wiley (22 March 2023)

Title: The economic evaluation and cost benefit analysis for COVID-19 vaccination

| Search terms                                            |                                                                                                                                                                                                                                                                                                  | Items found |
|---------------------------------------------------------|--------------------------------------------------------------------------------------------------------------------------------------------------------------------------------------------------------------------------------------------------------------------------------------------------|-------------|
| Population: COVID-19 <sup>1)</sup>                      |                                                                                                                                                                                                                                                                                                  |             |
| 1                                                       | Exp Coronavirus/                                                                                                                                                                                                                                                                                 | 9,026       |
| 2                                                       | Exp Coronavirus Infections/                                                                                                                                                                                                                                                                      | 566         |
| 3                                                       | (COVID* or sars cov* or sarscov* or corona virus or coronavirus or ncov).ab,kf,ti                                                                                                                                                                                                                | 15,874      |
| 4                                                       | 1 or 2 or 3                                                                                                                                                                                                                                                                                      | 15,916      |
| Intervention: Vaccination                               |                                                                                                                                                                                                                                                                                                  |             |
| 5                                                       | Vaccine                                                                                                                                                                                                                                                                                          | 26,104      |
| 6                                                       | Vaccination                                                                                                                                                                                                                                                                                      | 17,950      |
| 7                                                       | Vaccin                                                                                                                                                                                                                                                                                           | 538         |
| 8                                                       | Immunization                                                                                                                                                                                                                                                                                     | 9,682       |
| 9                                                       | 5 or 6 or 7 or 8                                                                                                                                                                                                                                                                                 | 31,396      |
| Combined sets                                           |                                                                                                                                                                                                                                                                                                  |             |
| 10                                                      | 4 and 9                                                                                                                                                                                                                                                                                          | 2,272       |
| Health economic aspects /Economic aspects <sup>2)</sup> |                                                                                                                                                                                                                                                                                                  |             |
| 11                                                      | MeSH descriptor: [Economics] this term only                                                                                                                                                                                                                                                      | 51          |
| 12                                                      | MeSH descriptor: [Costs and Cost Analysis] explode all trees                                                                                                                                                                                                                                     | 14,254      |
| 13                                                      | MeSH descriptor: [Economics, Dental] this term only                                                                                                                                                                                                                                              | 2           |
| 14                                                      | MeSH descriptor: [Economics, Hospital] explode all trees                                                                                                                                                                                                                                         | 824         |
| 15                                                      | MeSH descriptor: [Economics, Medical] this term only                                                                                                                                                                                                                                             | 32          |
| 16                                                      | MeSH descriptor: [Economics, Nursing] this term only                                                                                                                                                                                                                                             | 13          |
| 17                                                      | MeSH descriptor: [Economics, Pharmaceutical] this term only                                                                                                                                                                                                                                      | 121         |
| 18                                                      | ((economic* OR cost OR costs OR costly OR costing OR price OR prices OR pricing OR pharmacoeconomic* OR (expenditure* NOT energy) OR (value NEAR/2 money) OR budget*) NOT (((energy OR oxygen) NEAR/10 cost) OR (metabolic NEAR/10 cost) OR ((energy OR oxygen) NEAR/10 expenditure)))):ti,ab,kw | 96,915      |
| 19                                                      | 11-18                                                                                                                                                                                                                                                                                            | 97,008      |
| Combined sets                                           |                                                                                                                                                                                                                                                                                                  |             |
| 20                                                      | 10 and 19                                                                                                                                                                                                                                                                                        | 118         |
| Health economic aspects /Economic aspects <sup>2)</sup> |                                                                                                                                                                                                                                                                                                  |             |
| 21                                                      | ([mh ^Economics[mj]])                                                                                                                                                                                                                                                                            | 0           |
| 22                                                      | ([mh "costs and cost analysis"[mj]])                                                                                                                                                                                                                                                             | 855         |
| 23                                                      | (economic NEAR/2 model*)                                                                                                                                                                                                                                                                         | 931         |

|                                                         |                                                                                                                                                                                                                                                                                                                                       |        |
|---------------------------------------------------------|---------------------------------------------------------------------------------------------------------------------------------------------------------------------------------------------------------------------------------------------------------------------------------------------------------------------------------------|--------|
| 24                                                      | ((cost next/1 minimi*) OR cost-utilit* OR (health next/1 utilit*) OR (economic next/1 evaluation*) OR (economic next/1 review*) OR "cost outcome" OR "cost analysis" OR "cost analyses" OR "economic analysis" OR "economic analyses" OR (budget* next/1 impact next/1 analysis) OR (budget* next/1 impact next/1 analyses)):ti,ab,kw | 12,014 |
| 25                                                      | ((cost-effective* OR pharmacoeconomic* OR pharmaco-economic* OR cost-benefit OR costs)):ti,ab,kw                                                                                                                                                                                                                                      | 58,128 |
| 26                                                      | ("life year" OR "life years" OR qaly*)):ti,ab,kw                                                                                                                                                                                                                                                                                      | 7,314  |
| 27                                                      | ("cost-benefit analysis" OR "cost-benefit analyses" OR "cost-effectiveness analysis" OR "cost-effectiveness analyses"):ti,ab,kw                                                                                                                                                                                                       | 20,872 |
| 28                                                      | ((cost OR economic*)):ti,ab,kw AND ((costs OR cost-effectiveness OR markov)):ab                                                                                                                                                                                                                                                       | 32,679 |
| 29                                                      | 21-28                                                                                                                                                                                                                                                                                                                                 | 61,425 |
| Combined sets                                           |                                                                                                                                                                                                                                                                                                                                       |        |
| 30                                                      | 10 and 29                                                                                                                                                                                                                                                                                                                             | 42     |
| Health economic aspects /Economic aspects <sup>2)</sup> |                                                                                                                                                                                                                                                                                                                                       |        |
| 31                                                      | ((cost OR costs) NEAR/2 (illness OR disease OR sickness)):ti,ab,kw                                                                                                                                                                                                                                                                    | 1,947  |
| 32                                                      | ((burden OR burdens) NEAR/2 (illness OR disease OR diseases OR condition OR conditions OR economic*)):ti,ab,kw                                                                                                                                                                                                                        | 4,726  |
| 33                                                      | ("quality-adjusted life years" OR "quality adjusted life years" OR QALY OR QALYs)):ti,ab,kw                                                                                                                                                                                                                                           | 5,944  |
| 34                                                      | MeSH descriptor: [Quality-Adjusted Life Years] this term only                                                                                                                                                                                                                                                                         | 1,930  |
| 35                                                      | MeSH descriptor: [Cost of Illness] this term only                                                                                                                                                                                                                                                                                     | 1,054  |
| 36                                                      | MeSH descriptor: [Health Expenditures] this term only                                                                                                                                                                                                                                                                                 | 332    |
| 37                                                      | ((out-of-pocket NEAR/2 (payment OR payments OR expenditure OR expenditures OR cost OR costs OR spending OR expense OR expenses)):ti,ab,kw                                                                                                                                                                                             | 90,694 |
| 38                                                      | ((expenditure OR expenditures) NEAR/3 (health OR direct OR indirect)):ti,ab,kw                                                                                                                                                                                                                                                        | 1,072  |
| 39                                                      | ((adjusted OR quality-adjusted) NEAR/2 (year OR years)):ti,ab,kw                                                                                                                                                                                                                                                                      | 7,089  |
| 40                                                      | 31-39                                                                                                                                                                                                                                                                                                                                 | 95,170 |
| Combined sets                                           |                                                                                                                                                                                                                                                                                                                                       |        |
| 41                                                      | 10 and 40                                                                                                                                                                                                                                                                                                                             | 107    |
| 42                                                      | 20 or 30 or 41                                                                                                                                                                                                                                                                                                                        | 118    |

1) [COVID-19 and pregnancy \(sbu.se\)](#)

2) [Bilaga 1 Sökdokumentation \(sbu.se\)](#)

The search result, usually found at the end of the documentation, forms the list of abstracts.

:au = Author

MeSH = Term from the Medline controlled vocabulary, including terms found below this term in the MeSH hierarchy

this term only = Does not include terms found below this term in the MeSH hierarchy

:ti = title

:ab = abstract

:kw = keyword

\* = Truncation

“ “ = Citation Marks; searches for an exact phrase

NEAR/x = Finds the terms when they are within x words of each other. Terms can appear in either order

NEXT/x = Finds the terms when they appear next to each other. Terms must appear in the order specified

CDSR = Cochrane Database of Systematic Review

CENTRAL = Cochrane Central Register of Controlled Trials, “trials”

# CINAHL

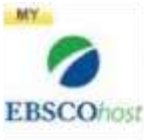

Thursday, February 09, 2023 6:28:26 PM

| #  | Query                                                                                                        | Limiters/Expanders                                                               | Last Run Via                                                                                                       | Results |
|----|--------------------------------------------------------------------------------------------------------------|----------------------------------------------------------------------------------|--------------------------------------------------------------------------------------------------------------------|---------|
| S1 | TI "severe acute respiratory syndrome coronavirus 2" OR AB "severe acute respiratory syndrome coronavirus 2" | Expanders - Apply equivalent subjects<br>Search modes - Find all my search terms | Interface - EBSCOhost<br>Research Databases<br>Search Screen - Advanced Search<br>Database - CINAHL with Full Text | 553     |
| S2 | TI "2019 nCoV" OR AB "2019 nCoV"                                                                             | Expanders - Apply equivalent subjects<br>Search modes - Find all my search terms | Interface - EBSCOhost<br>Research Databases<br>Search Screen - Advanced Search<br>Database - CINAHL with Full Text | 2       |
| S3 | TI 2019nCoV OR AB 2019nCoV                                                                                   | Expanders - Apply equivalent subjects<br>Search modes - Find all my search terms | Interface - EBSCOhost<br>Research Databases<br>Search Screen - Advanced Search<br>Database - CINAHL with Full Text | 2,629   |
| S4 | TI "2019-nCov" OR AB "2019-nCov"                                                                             | Expanders - Apply equivalent subjects<br>Search modes - Find all my search terms | Interface - EBSCOhost<br>Research Databases<br>Search Screen - Advanced Search<br>Database - CINAHL with Full Text | 71      |
| S5 | TI CoVID-19 OR AB CoVID-19                                                                                   | Expanders - Apply equivalent subjects<br>Search modes - Find all my search terms | Interface - EBSCOhost<br>Research Databases<br>Search Screen - Advanced Search<br>Database - CINAHL with Full Text | 21,841  |
| S6 | TI SARS-CoV-2 OR AB SARS-CoV-2                                                                               | Expanders - Apply equivalent subjects<br>Search modes - Find all my search terms | Interface - EBSCOhost<br>Research Databases<br>Search Screen - Advanced Search                                     | 2,629   |

|     |                                                  |                                                                                  |                                                                                                                    |        |
|-----|--------------------------------------------------|----------------------------------------------------------------------------------|--------------------------------------------------------------------------------------------------------------------|--------|
|     |                                                  |                                                                                  | Database - CINAHL with Full Text                                                                                   |        |
| S7  | TI "SARS CoV 2" OR AB "SARS CoV 2"               | Expanders - Apply equivalent subjects<br>Search modes - Find all my search terms | Interface - EBSCOhost<br>Research Databases<br>Search Screen - Advanced Search<br>Database - CINAHL with Full Text | 20     |
| S8  | TI CoVid OR AB CoVid                             | Expanders - Apply equivalent subjects<br>Search modes - Find all my search terms | Interface - EBSCOhost<br>Research Databases<br>Search Screen - Advanced Search<br>Database - CINAHL with Full Text | 21,841 |
| S9  | TI nCov OR AB nCov                               | Expanders - Apply equivalent subjects<br>Search modes - Find all my search terms | Interface - EBSCOhost<br>Research Databases<br>Search Screen - Advanced Search<br>Database - CINAHL with Full Text | 7      |
| S10 | TI "novel coronavirus" OR AB "novel coronavirus" | Expanders - Apply equivalent subjects<br>Search modes - Find all my search terms | Interface - EBSCOhost<br>Research Databases<br>Search Screen - Advanced Search<br>Database - CINAHL with Full Text | 521    |
| S11 | TI "new coronavirus" OR AB "new coronavirus"     | Expanders - Apply equivalent subjects<br>Search modes - Find all my search terms | Interface - EBSCOhost<br>Research Databases<br>Search Screen - Advanced Search<br>Database - CINAHL with Full Text | 67     |
| S12 | TI "coronavirus 2019" OR AB coronavirus 2019"    | Expanders - Apply equivalent subjects<br>Search modes - Find all my search terms | Interface - EBSCOhost<br>Research Databases<br>Search Screen - Advanced Search<br>Database - CINAHL with Full Text | 2,163  |
| S13 | TI "SARS coronavirus 2" OR AB "SARS              | Expanders - Apply equivalent subjects                                            | Interface - EBSCOhost<br>Research Databases                                                                        | 3      |

|     |                                                                                       |                                                                                  |                                                                                                                 |        |
|-----|---------------------------------------------------------------------------------------|----------------------------------------------------------------------------------|-----------------------------------------------------------------------------------------------------------------|--------|
|     | coronavirus 2"                                                                        | Search modes - Find all my search terms                                          | Search Screen - Advanced Search<br>Database - CINAHL with Full Text                                             |        |
| S14 | TI CoVID19 OR AB CoVID19                                                              | Expanders - Apply equivalent subjects<br>Search modes - Find all my search terms | Interface - EBSCOhost Research Databases<br>Search Screen - Advanced Search<br>Database - CINAHL with Full Text | 21,841 |
| S15 | S1 OR S2 OR S3 OR S4 OR S5 OR S6 OR S7 OR S8 OR S9 OR S10 OR S11 OR S12 OR S13 OR S14 | Expanders - Apply equivalent subjects<br>Search modes - Find all my search terms | Interface - EBSCOhost Research Databases<br>Search Screen - Advanced Search<br>Database - CINAHL with Full Text | 22,872 |
| S16 | MH "Severe Acute Respiratory Syndrome"                                                | Expanders - Apply equivalent subjects<br>Search modes - Find all my search terms | Interface - EBSCOhost Research Databases<br>Search Screen - Advanced Search<br>Database - CINAHL with Full Text | 433    |
| S17 | MH "SARS Virus"                                                                       | Expanders - Apply equivalent subjects<br>Search modes - Find all my search terms | Interface - EBSCOhost Research Databases<br>Search Screen - Advanced Search<br>Database - CINAHL with Full Text | 74     |
| S18 | TI "Severe acute respiratory syndrome" OR AB "Severe acute respiratory syndrome"      | Expanders - Apply equivalent subjects<br>Search modes - Find all my search terms | Interface - EBSCOhost Research Databases<br>Search Screen - Advanced Search<br>Database - CINAHL with Full Text | 953    |
| S19 | TI SARS OR AB SARS                                                                    | Expanders - Apply equivalent subjects<br>Search modes - Find all my search terms | Interface - EBSCOhost Research Databases<br>Search Screen - Advanced Search<br>Database - CINAHL with Full Text | 776    |



|     |                                 |                                                                                  |                                                                                                                    |        |
|-----|---------------------------------|----------------------------------------------------------------------------------|--------------------------------------------------------------------------------------------------------------------|--------|
| S20 | TI SARS-CoV OR AB SARS-CoV      | Expanders - Apply equivalent subjects<br>Search modes - Find all my search terms | Interface - EBSCOhost<br>Research Databases<br>Search Screen - Advanced Search<br>Database - CINAHL with Full Text | 86     |
| S21 | S16 OR S17 OR S18 OR S19 OR S20 | Expanders - Apply equivalent subjects<br>Search modes - Find all my search terms | Interface - EBSCOhost<br>Research Databases<br>Search Screen - Advanced Search<br>Database - CINAHL with Full Text | 1,640  |
| S22 | S15 OR S21                      | Expanders - Apply equivalent subjects<br>Search modes - Find all my search terms | Interface - EBSCOhost<br>Research Databases<br>Search Screen - Advanced Search<br>Database - CINAHL with Full Text | 23,625 |
| S23 | "vaccination**"                 | Expanders - Apply equivalent subjects<br>Search modes - Find all my search terms | Interface - EBSCOhost<br>Research Databases<br>Search Screen - Advanced Search<br>Database - CINAHL with Full Text | 9,778  |
| S24 | "immunization**"                | Expanders - Apply equivalent subjects<br>Search modes - Find all my search terms | Interface - EBSCOhost<br>Research Databases<br>Search Screen - Advanced Search<br>Database - CINAHL with Full Text | 9,970  |
| S25 | "immunisation**"                | Expanders - Apply equivalent subjects<br>Search modes - Find all my search terms | Interface - EBSCOhost<br>Research Databases<br>Search Screen - Advanced Search<br>Database - CINAHL with Full Text | 4,263  |
| S26 | "immunize**"                    | Expanders - Apply equivalent subjects<br>Search modes - Find all my search terms | Interface - EBSCOhost<br>Research Databases<br>Search Screen - Advanced Search                                     | 499    |

|     |                                                                                                                                                                                                                                                                                                                                                              |                                                                                  |                                                                                                                    |        |
|-----|--------------------------------------------------------------------------------------------------------------------------------------------------------------------------------------------------------------------------------------------------------------------------------------------------------------------------------------------------------------|----------------------------------------------------------------------------------|--------------------------------------------------------------------------------------------------------------------|--------|
|     |                                                                                                                                                                                                                                                                                                                                                              |                                                                                  | Database - CINAHL with Full Text                                                                                   |        |
| S27 | "immunise**"                                                                                                                                                                                                                                                                                                                                                 | Expanders - Apply equivalent subjects<br>Search modes - Find all my search terms | Interface - EBSCOhost<br>Research Databases<br>Search Screen - Advanced Search<br>Database - CINAHL with Full Text | 57     |
| S28 | "vaccine**"                                                                                                                                                                                                                                                                                                                                                  | Expanders - Apply equivalent subjects<br>Search modes - Find all my search terms | Interface - EBSCOhost<br>Research Databases<br>Search Screen - Advanced Search<br>Database - CINAHL with Full Text | 16,431 |
| S29 | "shots**"                                                                                                                                                                                                                                                                                                                                                    | Expanders - Apply equivalent subjects<br>Search modes - Find all my search terms | Interface - EBSCOhost<br>Research Databases<br>Search Screen - Advanced Search<br>Database - CINAHL with Full Text | 530    |
| S30 | S23 OR S24 OR S25 OR S26 OR S27 OR S28 OR S29                                                                                                                                                                                                                                                                                                                | Expanders - Apply equivalent subjects<br>Search modes - Find all my search terms | Interface - EBSCOhost<br>Research Databases<br>Search Screen - Advanced Search<br>Database - CINAHL with Full Text | 22,131 |
| S31 | ((MH "Economics") OR (MH "Costs and Cost Analysis+") OR (MH "Health Care Costs+") OR (MH "Economics, Dental") OR (MH "Nursing Costs") OR (MH "Economics, Pharmaceutical") OR TI (econom* or cost or costs or costly or costing or price or prices or pricing or pharmaco-economic*)) OR AB (econom* or cost or costs or costly or costing or price or prices | Expanders - Apply equivalent subjects<br>Search modes - Find all my search terms | Interface - EBSCOhost<br>Research Databases<br>Search Screen - Advanced Search<br>Database - CINAHL with Full Text | 91,220 |

or pricing or  
 pharmacoeconomic\*) OR  
 TI (Expenditure\* NOT  
 energy) OR AB  
 (Expenditure\* NOT  
 energy) OR TI (value N1  
 money) OR AB (value N1  
 money) OR TI (budget\*)  
 OR AB (budget\*)) NOT (TI  
 (Metabolic W2 cost) OR  
 AB (Metabolic W2 cost)  
 OR TI ((energy OR  
 oxygen) W2 cost) OR AB  
 ((energy OR oxygen) W2  
 cost) OR TI ((Energy OR  
 oxygen) W2 expenditure)  
 OR AB ((Energy OR  
 oxygen) W2 expenditure))

|     |                                 |                                                                                  |                                                                                                                    |        |
|-----|---------------------------------|----------------------------------------------------------------------------------|--------------------------------------------------------------------------------------------------------------------|--------|
| S32 | S22 AND S30 AND S31             | Expanders - Apply equivalent subjects<br>Search modes - Find all my search terms | Interface - EBSCOhost<br>Research Databases<br>Search Screen - Advanced Search<br>Database - CINAHL with Full Text | 199    |
| S33 | (MM "Economics")                | Expanders - Apply equivalent subjects<br>Search modes - Find all my search terms | Interface - EBSCOhost<br>Research Databases<br>Search Screen - Advanced Search<br>Database - CINAHL with Full Text | 2,524  |
| S34 | (MM "Costs and Cost Analysis+") | Expanders - Apply equivalent subjects<br>Search modes - Find all my search terms | Interface - EBSCOhost<br>Research Databases<br>Search Screen - Advanced Search<br>Database - CINAHL with Full Text | 11,341 |
| S35 | TX (economic N1 model*)         | Expanders - Apply equivalent subjects<br>Search modes - Find all my search terms | Interface - EBSCOhost<br>Research Databases<br>Search Screen - Advanced Search                                     | 2,182  |

|     |                                                                                                                                                                                                                                                                                                                                                                                                                                                       |                                                                                        |                                                                                                                          |        |
|-----|-------------------------------------------------------------------------------------------------------------------------------------------------------------------------------------------------------------------------------------------------------------------------------------------------------------------------------------------------------------------------------------------------------------------------------------------------------|----------------------------------------------------------------------------------------|--------------------------------------------------------------------------------------------------------------------------|--------|
|     |                                                                                                                                                                                                                                                                                                                                                                                                                                                       |                                                                                        | Database - CINAHL with Full Text                                                                                         |        |
| S36 | TI ( "cost minimi*" or cost-<br>utilit* or "health utilit*" or<br>"economic evaluation*" or<br>"economic review*" or<br>"cost outcome" or "cost<br>analys#s" or "economic<br>analys#s" or "budget*<br>impact analys#s" ) OR AB<br>( "cost minimi*" or cost-<br>utilit* or "health utilit*" or<br>"economic evaluation*" or<br>"economic review*" or<br>"cost outcome" or "cost<br>analys#s" or "economic<br>analys#s" or "budget*<br>impact analys#s" | Expanders - Apply<br>equivalent subjects<br>Search modes - Find all<br>my search terms | Interface - EBSCOhost<br>Research Databases<br>Search Screen - Advanced<br>Search<br>Database - CINAHL with Full<br>Text | 5,992  |
| S37 | TI cost-effective* or<br>pharmacoeconomic* or<br>pharmaco-economic* or<br>cost-benefit or costs                                                                                                                                                                                                                                                                                                                                                       | Expanders - Apply<br>equivalent subjects<br>Search modes - Find all<br>my search terms | Interface - EBSCOhost<br>Research Databases<br>Search Screen - Advanced<br>Search<br>Database - CINAHL with Full<br>Text | 59,817 |
| S38 | AB "life year" or "life<br>years" or qaly* or "cost-<br>benefit analys#s" or<br>"costeffectiveness<br>analys#s"                                                                                                                                                                                                                                                                                                                                       | Expanders - Apply<br>equivalent subjects<br>Search modes - Find all<br>my search terms | Interface - EBSCOhost<br>Research Databases<br>Search Screen - Advanced<br>Search<br>Database - CINAHL with Full<br>Text | 8,714  |
| S39 | TI ( cost or economic* )<br>AND AB ( costs or cost-<br>effectiveness or markov )                                                                                                                                                                                                                                                                                                                                                                      | Expanders - Apply<br>equivalent subjects<br>Search modes - Find all<br>my search terms | Interface - EBSCOhost<br>Research Databases<br>Search Screen - Advanced<br>Search<br>Database - CINAHL with Full<br>Text | 7,182  |
| S40 | S33 OR S34 OR S35 OR<br>S36 OR S37 OR S38 OR<br>S39                                                                                                                                                                                                                                                                                                                                                                                                   | Expanders - Apply<br>equivalent subjects<br>Search modes - Find all<br>my search terms | Interface - EBSCOhost<br>Research Databases<br>Search Screen - Advanced<br>Search                                        | 64,551 |

|                                                                                                                                                                  |                                                                                  |  |                                                                                                                    |        |
|------------------------------------------------------------------------------------------------------------------------------------------------------------------|----------------------------------------------------------------------------------|--|--------------------------------------------------------------------------------------------------------------------|--------|
| S41                                                                                                                                                              |                                                                                  |  | Database - CINAHL with Full Text                                                                                   |        |
| S22 AND S30 AND S40                                                                                                                                              | Expanders - Apply equivalent subjects<br>Search modes - Find all my search terms |  | Interface - EBSCOhost<br>Research Databases<br>Search Screen - Advanced Search<br>Database - CINAHL with Full Text | 78     |
| S42                                                                                                                                                              |                                                                                  |  |                                                                                                                    |        |
| TI ( cost# N1 (illness or disease or sickness) ) OR AB ( cost# N1 (illness or disease or sickness) )                                                             | Expanders - Apply equivalent subjects<br>Search modes - Find all my search terms |  | Interface - EBSCOhost<br>Research Databases<br>Search Screen - Advanced Search<br>Database - CINAHL with Full Text | 322    |
| S43                                                                                                                                                              |                                                                                  |  |                                                                                                                    |        |
| TI ( burden# N1 (illness or disease# or condition# or economic*) ) OR AB ( burden# N1 (illness or disease# or condition# or economic*) )                         | Expanders - Apply equivalent subjects<br>Search modes - Find all my search terms |  | Interface - EBSCOhost<br>Research Databases<br>Search Screen - Advanced Search<br>Database - CINAHL with Full Text | 3,626  |
| S44                                                                                                                                                              |                                                                                  |  |                                                                                                                    |        |
| TI ( "quality-adjusted life years" or "quality adjusted life years" or QALY# ) OR AB ( "quality-adjusted life years" or "quality adjusted life years" or QALY# ) | Expanders - Apply equivalent subjects<br>Search modes - Find all my search terms |  | Interface - EBSCOhost<br>Research Databases<br>Search Screen - Advanced Search<br>Database - CINAHL with Full Text | 1,055  |
| S45                                                                                                                                                              |                                                                                  |  |                                                                                                                    |        |
| (MH "Quality-Adjusted Life Years")                                                                                                                               | Expanders - Apply equivalent subjects<br>Search modes - Find all my search terms |  | Interface - EBSCOhost<br>Research Databases<br>Search Screen - Advanced Search<br>Database - CINAHL with Full Text | 1,051  |
| S46                                                                                                                                                              |                                                                                  |  |                                                                                                                    |        |
| (MH "Economic Aspects of Illness")                                                                                                                               | Expanders - Apply equivalent subjects<br>Search modes - Find all my search terms |  | Interface - EBSCOhost<br>Research Databases<br>Search Screen - Advanced Search<br>Database - CINAHL with Full Text | 2,562  |
| S47                                                                                                                                                              |                                                                                  |  |                                                                                                                    |        |
| (MH "Health Care Costs+")                                                                                                                                        | Expanders - Apply equivalent subjects                                            |  | Interface - EBSCOhost<br>Research Databases                                                                        | 16,519 |

|     |                                                                                                                                                                               |                                                                                  |                                                                                                                 |        |
|-----|-------------------------------------------------------------------------------------------------------------------------------------------------------------------------------|----------------------------------------------------------------------------------|-----------------------------------------------------------------------------------------------------------------|--------|
| S48 |                                                                                                                                                                               | Search modes - Find all my search terms                                          | Search Screen - Advanced Search<br>Database - CINAHL with Full Text                                             |        |
|     | (MH "Costs and Cost Analysis")                                                                                                                                                | Expanders - Apply equivalent subjects<br>Search modes - Find all my search terms | Interface - EBSCOhost Research Databases<br>Search Screen - Advanced Search<br>Database - CINAHL with Full Text | 3,807  |
| S49 |                                                                                                                                                                               |                                                                                  |                                                                                                                 |        |
|     | TI ( out-of-pocket N1 (payment# or expenditure# or cost# or spending or expense#) )<br>OR AB ( out-of-pocket N1 (payment# or expenditure# or cost# or spending or expense#) ) | Expanders - Apply equivalent subjects<br>Search modes - Find all my search terms | Interface - EBSCOhost Research Databases<br>Search Screen - Advanced Search<br>Database - CINAHL with Full Text | 812    |
| S50 |                                                                                                                                                                               |                                                                                  |                                                                                                                 |        |
|     | TI ( expenditure# N2 (health or direct or indirect) ) OR AB ( expenditure# N2 (health or direct or indirect) )                                                                | Expanders - Apply equivalent subjects<br>Search modes - Find all my search terms | Interface - EBSCOhost Research Databases<br>Search Screen - Advanced Search<br>Database - CINAHL with Full Text | 1,140  |
| S51 |                                                                                                                                                                               |                                                                                  |                                                                                                                 |        |
|     | TI ( (adjusted or quality-adjusted) N1 year# ) OR AB ( (adjusted or quality-adjusted) N1 year# )                                                                              | Expanders - Apply equivalent subjects<br>Search modes - Find all my search terms | Interface - EBSCOhost Research Databases<br>Search Screen - Advanced Search<br>Database - CINAHL with Full Text | 1,899  |
| S52 |                                                                                                                                                                               |                                                                                  |                                                                                                                 |        |
|     | S42 OR S43 OR S44 OR S45 OR S46 OR S47 OR S48 OR S49 OR S50 OR S51                                                                                                            | Expanders - Apply equivalent subjects<br>Search modes - Find all my search terms | Interface - EBSCOhost Research Databases<br>Search Screen - Advanced Search<br>Database - CINAHL with Full Text | 27,072 |
| S53 |                                                                                                                                                                               |                                                                                  |                                                                                                                 |        |
|     | S22 AND S30 AND S52                                                                                                                                                           | Expanders - Apply equivalent subjects<br>Search modes - Find all my search terms | Interface - EBSCOhost Research Databases<br>Search Screen - Advanced Search                                     | 40     |

|     |                   |                                                                                  |                                                                                                                                                             |     |
|-----|-------------------|----------------------------------------------------------------------------------|-------------------------------------------------------------------------------------------------------------------------------------------------------------|-----|
| S54 | S32 OR S41 OR S53 | Expanders - Apply equivalent subjects<br>Search modes - Find all my search terms | Database - CINAHL with Full Text<br><br>Interface - EBSCOhost Research Databases<br>Search Screen - Advanced Search<br><br>Database - CINAHL with Full Text | 216 |
|-----|-------------------|----------------------------------------------------------------------------------|-------------------------------------------------------------------------------------------------------------------------------------------------------------|-----|

**Psycinfo**

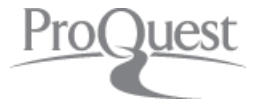

---

Search Strategy from ProQuest  
2023 February 09 18:08

---



## SEARCH STRATEGY

| Set No. | Searched for                                                                                                                                                                                                                                                                                                                                                                                                                                                                                                            | Databases     | Results |
|---------|-------------------------------------------------------------------------------------------------------------------------------------------------------------------------------------------------------------------------------------------------------------------------------------------------------------------------------------------------------------------------------------------------------------------------------------------------------------------------------------------------------------------------|---------------|---------|
| S1      | noft(DE "Coronavirus" OR DE "Middle East Respiratory Syndrome" OR DE "Severe Acute Respiratory Syndrome" )                                                                                                                                                                                                                                                                                                                                                                                                              | APA PsycInfo® | 1087    |
| S2      | noft(DE "Coronavirus" OR DE "Middle East Respiratory Syndrome" OR DE "Severe Acute Respiratory Syndrome") AND la.exact("ENG")                                                                                                                                                                                                                                                                                                                                                                                           | APA PsycInfo® | 954     |
| S3      | (noft(TX) ((noft(corona*) OR noft(corono*)) noft(n1) (noft(virus*) OR noft(viral*) OR noft(virinae*)))) AND la.exact("ENG")                                                                                                                                                                                                                                                                                                                                                                                             | APA PsycInfo® | 0       |
| S4      | TX (coronavirus* or coronavirus* or coronavirinae* or Coronavirus* or Coronovirus* or Wuhan* or Hubei* or Huanan or "2019-nCoV" or 2019nCoV or nCoV2019 or "nCoV-2019" or "COVID-19" or COVID19 or "CORVID-19" or CORVID19 or "WN-CoV" or WNCov or "HCoV-19" or HCoV19 or CoV or "2019 novel*" or Ncov or "n-cov" or "SARS-CoV-2" or "SARSCoV-2" or "SARSCoV2" or "SARS-CoV2" or SARSCov19 or "SARS-Cov19" or "SARSCov-19" or "SARS-Cov-19" or Ncovor or Ncorona* or Ncorono* or NcovWuhan* or NcovHubei* or NcovChina* | APA PsycInfo® | 10      |

|    |                                                                                                                   |                                                                       |      |
|----|-------------------------------------------------------------------------------------------------------------------|-----------------------------------------------------------------------|------|
|    | or<br>NcovChinese*)                                                                                               |                                                                       |      |
| S5 | SU.exact("SEVERE ACUTE<br>RESPIRATORY<br>SYNDROME")                                                               | APA PsycInfo®                                                         | 413  |
| S6 | noft(TX) ((noft(corona*) or<br>noft(corono*)) noft(n1)<br>(noft(virus*) or noft(viral*)<br>or<br>noft(virinae*))) | APA PsycInfo®                                                         | 0    |
| S7 | S2 OR S3 OR S4 OR S5 OR<br>S6                                                                                     | APA PsycInfo®<br>These databases are searched for part of your query. | 1335 |
| S8 | noft("vaccination*")                                                                                              | APA PsycInfo®                                                         | 6571 |
| S9 | noft("immunization*")                                                                                             | APA PsycInfo®                                                         | 7772 |

|     |                                                                                                                                                                                                                                                                                                                                                                                                                                                                                                                                                                                        |                                                                       |       |
|-----|----------------------------------------------------------------------------------------------------------------------------------------------------------------------------------------------------------------------------------------------------------------------------------------------------------------------------------------------------------------------------------------------------------------------------------------------------------------------------------------------------------------------------------------------------------------------------------------|-----------------------------------------------------------------------|-------|
| S10 | noft("immunisation*")                                                                                                                                                                                                                                                                                                                                                                                                                                                                                                                                                                  | APA PsycInfo®                                                         | 337   |
| S11 | noft("immunize*")                                                                                                                                                                                                                                                                                                                                                                                                                                                                                                                                                                      | APA PsycInfo®                                                         | 820   |
| S12 | noft("immunise*")                                                                                                                                                                                                                                                                                                                                                                                                                                                                                                                                                                      | APA PsycInfo®                                                         | 50    |
| S13 | noft("vaccine*")                                                                                                                                                                                                                                                                                                                                                                                                                                                                                                                                                                       | APA PsycInfo®                                                         | 7389  |
| S14 | noft("shots*")                                                                                                                                                                                                                                                                                                                                                                                                                                                                                                                                                                         | APA PsycInfo®                                                         | 1067  |
| S15 | S8 OR S9 OR S10 OR S11 OR<br>S12 OR S13 OR S14                                                                                                                                                                                                                                                                                                                                                                                                                                                                                                                                         | APA PsycInfo®<br>These databases are searched for part of your query. | 13186 |
| S16 | (noft(DE "Economics")) OR<br>(noft(DE "Health Care<br>Economics")) OR (noft(DE<br>"Costs and Cost Analysis")<br>OR<br>noft(DE "Budgets") OR<br>noft(DE<br>"Health Care Costs")) OR<br>noft(TI) (noft(economic*)<br>OR<br>noft(cost) OR noft(Costs)<br>OR<br>noft(costly) OR noft(costing)<br>OR noft(price) OR<br>noft(prices)<br>OR noft(pricing) OR<br>noft(pharmacoeconomic*))<br>OR noft(AB)<br>(noft(economic*)<br>OR noft(cost) OR<br>noft(Costs)<br>OR noft(costly) OR<br>noft(costing)<br>OR noft(price) OR<br>noft(prices)<br>OR noft(pricing) OR<br>noft(pharmacoeconomic*)) | APA PsycInfo®                                                         | 9673  |

|     |                                                                                                                                                                                                                                                                                                                           |                                                                       |    |
|-----|---------------------------------------------------------------------------------------------------------------------------------------------------------------------------------------------------------------------------------------------------------------------------------------------------------------------------|-----------------------------------------------------------------------|----|
| S17 | S7 AND S15 AND S16                                                                                                                                                                                                                                                                                                        | APA PsycInfo®<br>These databases are searched for part of your query. | 1  |
| S18 | noft(MM "Economics")                                                                                                                                                                                                                                                                                                      | APA PsycInfo®                                                         | 60 |
| S19 | (noft(MM "Costs and Cost Analysis") OR noft(MM "Budgets") OR noft(MM "Cost Containment") OR noft(MM "Health Care Costs"))                                                                                                                                                                                                 | APA PsycInfo®                                                         | 39 |
| S20 | noft(TX) (noft(economic N1 model*))                                                                                                                                                                                                                                                                                       | APA PsycInfo®                                                         | 0  |
| S21 | TI ( "cost minimi*" or cost-utilit* or "health utilit*" or "economic evaluation*" or "economic review*" or "cost outcome" or "cost analys#s" or "economic analys#s" or "budget* impact analys#s" )<br>OR AB ( "cost minimi*" or cost-utilit* or "health utilit*" or "economic evaluation*" or "economic review*" or "cost | APA PsycInfo®                                                         | 7  |

|     |                                                                                                                                                                                                           |               |        |
|-----|-----------------------------------------------------------------------------------------------------------------------------------------------------------------------------------------------------------|---------------|--------|
| S22 | outcome" or "cost analys#s" or "economic analys#s" or "budget* impact analys#s" )<br>noft(TI cost-effective*) or noft(pharmacoeconomic*) or noft(pharmaco-economic*) or noft(cost-benefit) or noft(costs) | APA PsycInfo® | 126874 |
| S23 | noft(AB "life year") or noft("life years") or noft(qaly*) or noft("cost-benefit analys#s") or noft("costeffectiveness analys#s")                                                                          | APA PsycInfo® | 3025   |
| S24 | ((SU.exact("BENEFIT COST ANALYSIS") OR SU.exact("COST BENEFIT ANALYSIS") OR SU.exact("COST BENEFIT ANALYSIS") OR SU.exact("COST BENEFIT ANALYSES") OR                                                     | APA PsycInfo® | 739    |

|     |                                                                                                                                                                                          |                                                                       |        |
|-----|------------------------------------------------------------------------------------------------------------------------------------------------------------------------------------------|-----------------------------------------------------------------------|--------|
| S25 | SU.exact("COST BENEFIT ANALYSIS 03601") OR<br>SU.exact("COST BENEFIT ANALYSES") OR<br>SU.exact("COST BENEFIT ANALYSIS")) AND<br>SU.exact("QUALITY ADJUSTED LIFE YEARS"))                 | APA PsycInfo®<br>These databases are searched for part of your query. | 127884 |
| S26 | S18 OR S19 OR S20 OR<br>S21 OR S22 OR S23 OR<br>S24                                                                                                                                      | APA PsycInfo®<br>These databases are searched for part of your query. | 1      |
| S27 | noft(TI) ( noft(cost# N1)<br>(noft(illness) or<br>noft(disease)<br>or noft(sickness)) ) OR<br>noft(AB) ( noft(cost# N1)<br>(noft(illness) or<br>noft(disease)<br>or<br>noft(sickness)) ) | APA PsycInfo®                                                         | 0      |
| S28 | TI ( burden# N1 (illness or<br>disease# or condition# or<br>economic*) ) OR AB (<br>burden#<br>N1 (illness or disease# or<br>condition# or economic*) )                                  | APA PsycInfo®                                                         | 0      |
| S29 | TI ( "quality-adjusted life<br>years" or "quality adjusted<br>life<br>years" or QALY# ) OR AB (                                                                                          | APA PsycInfo®                                                         | 10     |

|     |                                                                                                                                                                                                                                                                         |                                                                       |      |
|-----|-------------------------------------------------------------------------------------------------------------------------------------------------------------------------------------------------------------------------------------------------------------------------|-----------------------------------------------------------------------|------|
| S30 | "quality-adjusted life years" or "quality adjusted life years" or QALY# )<br>noft(DE "Health Care Economics")                                                                                                                                                           | APA PsycInfo®                                                         | 111  |
| S31 | noft(DE "Costs and Cost Analysis")                                                                                                                                                                                                                                      | APA PsycInfo®                                                         | 1202 |
| S32 | noft(DE "Health Care Costs")                                                                                                                                                                                                                                            | APA PsycInfo®                                                         | 934  |
| S33 | noft(TI) ( noft(out-of-pocket N1)<br>(noft(payment#) or noft(expenditure#) or noft(cost#) or noft(spending) or noft(expense#)) ) OR<br>noft(AB) ( noft(out-of-pocket N1)<br>(noft(payment#) or noft(expenditure#) or noft(cost#) or noft(spending) or noft(expense#)) ) | APA PsycInfo®                                                         | 0    |
| S34 | TI ( expenditure# N2 (health or direct or indirect) ) OR<br>AB ( expenditure# N2 (health or direct or indirect) )                                                                                                                                                       | APA PsycInfo®                                                         | 0    |
| S35 | TI ( expenditure# N2 (health or direct or indirect) ) OR<br>AB ( expenditure# N2 (health or direct or indirect) )                                                                                                                                                       | APA PsycInfo®                                                         | 1966 |
| S37 | TI ( (adjusted or quality-adjusted) N1 year# ) OR AB ( (adjusted or quality-adjusted) N1 year# )                                                                                                                                                                        | APA PsycInfo®<br>These databases are searched for part of your query. | 0    |
| S38 | S27 OR S28 OR S29 OR S30 OR S31 OR S32 OR S33 OR S34 OR S35<br>S7 AND S15 AND S37                                                                                                                                                                                       | APA PsycInfo®<br>These databases are searched for part of your query. | 2    |
| S39 | S17 OR S26 OR S38                                                                                                                                                                                                                                                       | APA PsycInfo®<br>These databases are searched for part of your query. |      |

---

Database copyright Ó 2023 ProQuest LLC. All rights reserved.

[Terms and Conditions](#) [Contact ProQuest](#)

## MEDLINE

Medline via Ovid (08 February 2023)

Title: The economic evaluation and cost benefit analysis for COVID-19 vaccination

| Search terms                                            | Items found                                                                                                                                                                                                                                                                                                                                                                                                                                                                                                                             |           |
|---------------------------------------------------------|-----------------------------------------------------------------------------------------------------------------------------------------------------------------------------------------------------------------------------------------------------------------------------------------------------------------------------------------------------------------------------------------------------------------------------------------------------------------------------------------------------------------------------------------|-----------|
| Population: COVID-19 <sup>1)</sup>                      |                                                                                                                                                                                                                                                                                                                                                                                                                                                                                                                                         |           |
| 1                                                       | Exp Coronavirus/                                                                                                                                                                                                                                                                                                                                                                                                                                                                                                                        | 160,105   |
| 2                                                       | Exp Coronavirus Infections/                                                                                                                                                                                                                                                                                                                                                                                                                                                                                                             | 221,170   |
| 3                                                       | (COVID* or sars cov* or sarscov* or corona virus or coronavirus or ncov).ab,kf,ti                                                                                                                                                                                                                                                                                                                                                                                                                                                       | 321,518   |
| 4                                                       | 1 or 2 or 3                                                                                                                                                                                                                                                                                                                                                                                                                                                                                                                             | 335,987   |
| Intervention: Vaccination (limit to COVID-19 search)    |                                                                                                                                                                                                                                                                                                                                                                                                                                                                                                                                         |           |
| 5                                                       | Vaccine                                                                                                                                                                                                                                                                                                                                                                                                                                                                                                                                 | 1,075     |
| 6                                                       | Vaccination                                                                                                                                                                                                                                                                                                                                                                                                                                                                                                                             | 4,079     |
| 7                                                       | Vaccin                                                                                                                                                                                                                                                                                                                                                                                                                                                                                                                                  | 45        |
| 8                                                       | Immunization                                                                                                                                                                                                                                                                                                                                                                                                                                                                                                                            | 219       |
| 9                                                       | 5 or 6 or 7 or 8                                                                                                                                                                                                                                                                                                                                                                                                                                                                                                                        | 5,413     |
| Health economic aspects /Economic aspects <sup>2)</sup> |                                                                                                                                                                                                                                                                                                                                                                                                                                                                                                                                         |           |
| 10                                                      | (economics/ or exp "costs and cost analysis"/ or economics, dental/ or exp "economics, hospital"/ or economics, medical/ or economics, nursing/ or economics, pharmaceutical/ or (economic\$ or cost or costs or costly or costing or price or prices or pricing or pharmaco-economic\$).ti,ab. or (expenditure\$ not energy).ti,ab. or (value adj1 money).ti,ab. or budget\$.ti,ab.) not (((energy or oxygen) adj cost) or (metabolic adj cost) or ((energy or oxygen) adj expenditure)).ti,ab. not (letter or historical article).pt. | 1,119,021 |
| Combined sets                                           |                                                                                                                                                                                                                                                                                                                                                                                                                                                                                                                                         |           |
| 11                                                      | 4 and 9 and 10                                                                                                                                                                                                                                                                                                                                                                                                                                                                                                                          | 364       |
| Health economic aspects /Economic aspects <sup>2)</sup> |                                                                                                                                                                                                                                                                                                                                                                                                                                                                                                                                         |           |
| 12                                                      | *economics/                                                                                                                                                                                                                                                                                                                                                                                                                                                                                                                             | 10,804    |
| 13                                                      | exp *"costs and cost analysis"/                                                                                                                                                                                                                                                                                                                                                                                                                                                                                                         | 79,232    |
| 14                                                      | (economic adj2 model*).mp.                                                                                                                                                                                                                                                                                                                                                                                                                                                                                                              | 14,723    |
| 15                                                      | (cost minimi* or cost-utilit* or health utilit* or economic evaluation* or economic review* or cost outcome or cost analys?s or economic analys?s or budget* impact analys?s).ti,ab,kf,kw.                                                                                                                                                                                                                                                                                                                                              | 39,500    |
| 16                                                      | (cost-effective* or pharmaco-economic* or pharmaco-economic* or cost-benefit or costs).ti,kf,kw                                                                                                                                                                                                                                                                                                                                                                                                                                         | 84,434    |
| 17                                                      | (life year or life years or qaly* or cost-benefit analys?s or cost-effectiveness analys?s).ab,kf,kw                                                                                                                                                                                                                                                                                                                                                                                                                                     | 37,308    |
| 18                                                      | (cost or economic*).ti,kf,kw. and (costs or cost-effectiveness or markov).ab.                                                                                                                                                                                                                                                                                                                                                                                                                                                           | 69,185    |
| 19                                                      | 12 or 13 or 14 or 15 or 16 or 17 or 18                                                                                                                                                                                                                                                                                                                                                                                                                                                                                                  | 205,732   |

|                                                         |                                                                                      |         |
|---------------------------------------------------------|--------------------------------------------------------------------------------------|---------|
| Combined sets                                           |                                                                                      |         |
| 20                                                      | 4 and 9 and 19                                                                       | 41      |
| Health economic aspects /Economic aspects <sup>2)</sup> |                                                                                      |         |
| 21                                                      | (cost? adj2 (illness or disease or sickness)).tw.                                    | 4,685   |
| 22                                                      | (burden? adj2 (illness or disease? or condition? or economic*)).tw.                  | 51,411  |
| 23                                                      | ("quality-adjusted life years" or "quality adjusted life years" or QALY?).tw.        | 15,858  |
| 24                                                      | Quality-adjusted life years (limit to COVID-19 search)                               | 98      |
| 25                                                      | "cost of illness"/                                                                   | 31,243  |
| 26                                                      | Health expenditures/                                                                 | 23,630  |
| 27                                                      | (out-of-pocket adj2 (payment? or expenditure? or cost? or spending or expense?)).tw. | 6,351   |
| 28                                                      | (expenditure? adj3 (health or direct or indirect)).tw.                               | 10,405  |
| 29                                                      | ((adjusted or quality-adjusted) adj2 year?).tw.                                      | 27,167  |
| 30                                                      | 21 or 22 or 23 or 24 or 25 or 26 or 27 or 28 or 29                                   | 132,187 |
| Combined sets                                           |                                                                                      |         |
| 31                                                      | 4 and 9 and 30                                                                       | 73      |
| 32                                                      | 11 or 20 or 31                                                                       | 407     |

- 1) [COVID-19 and pregnancy \(sbu.se\)](#)
- 2) [Bilaga 1 Sökdokumentation \(sbu.se\)](#)

.ab. =Abstract

.ab,ti. = Abstract or title

.af.= All fields

.bt.= Book title

Exp= Term from the Medline controlled vocabulary, including terms found below this term in the MeSH hierarchy

.kf.= Keyword heading word

.sh.= Term from the Medline controlled vocabulary

.ti. = Title

/ = Term from the Medline controlled vocabulary, but does not include terms found below this term in the MeSH hierarchy

\* = Focus (if found in front of a MeSH-term)

\* or \$= Truncation (if found at the end of a free text term)

.mp=text, heading word, subject area node,

title “ “ = Citation Marks; searches for an

exact phrase



ADJn= positional operator that lets you retrieve records that contain your terms (in any order) within a specified number (n) of words of each other.

## **Appendix 2**

### **Excluded studies**

Articles that seemed relevant based on their titles and abstracts, but were excluded based on their full texts, as they did not meet the inclusion criteria.

| Article (author, title, source)                                                                                                                                                                                                                                  | Main reason for exclusion |
|------------------------------------------------------------------------------------------------------------------------------------------------------------------------------------------------------------------------------------------------------------------|---------------------------|
| Letter from the Editor. Human Vaccines and Immunotherapeutics. 2020;16(9):2003-4.                                                                                                                                                                                | Not Economic evaluation   |
| Meeting of the Immunization and Vaccine-related Implementation Research Advisory Committee (IVIR-AC), March 20212021 2021-4-30. World Health Organization.                                                                                                       | Not Economic evaluation   |
| 3.H. Workshop: The role of HTA for COVID-19 vaccines: present and future perspectives...14th European Public Health Conference (Virtual), Public health futures in a changing world, November 10-12, 2021. European Journal of Public Health. 2021;31:iii75-iii. | Not Economic evaluation   |
| Abraham I, Lee KKC, Gregg M. Journal of Medical Economics in review: the best of 2021. Journal of Medical Economics. 2022;25(1):282-6.                                                                                                                           | Wrong Population          |
| Addae A, Ramjee L, Tremblay G. EE7 Economic Evaluation of COVID-19 Vaccines: A Targeted Literature Review. Value in Health. 2022;25(7):S336.                                                                                                                     | Wrong Publication text    |
| Agarwal RN, Aggarwal R, arapu P, Aggarwal H, Verma A, Haque A, et al. COVID-19 Vaccination Drive in a Low-Volume Primary Care Clinic: Challenges & Lessons Learned in Using Homegrown Self-Scheduling Web-Based Mobile Platforms. Vaccines. 2022;10(7).          | Not Economic evaluation   |
| Al-M, hari A, Brennan RJ, Abubakar A, Hajjeh R. Towards healthier and better prepared Eastern Mediterranean Region: Moving forward post-COVID-19. BMJ Global Health. 2022;7(4).                                                                                  | Not Economic evaluation   |
| Ale BJM, Slater DH, Hartford DND. The ethical dilemmas of risky decisions. Risk analysis : an official publication of the Society for Risk Analysis. 2022.                                                                                                       | Not Economic evaluation   |
| Alvarez MM, Bravo-González S, Trujillo-De Santiago G. Modeling vaccination strategies in an Excel spreadsheet: Increasing the rate of vaccination is more effective than increasing the vaccination coverage for containing COVID-19. PLoS ONE. 2021;16(7).      | Not Economic evaluation   |
| Angelis A, Baltussen R, Tervonen T. The Need for Novel Approaches in Assessing the Value of COVID-19 Vaccines. American Journal of Public Health. 2021;111(2):205-8.                                                                                             | Not Economic evaluation   |

|                                                                                                                                                                                                                                                                     |                         |
|---------------------------------------------------------------------------------------------------------------------------------------------------------------------------------------------------------------------------------------------------------------------|-------------------------|
| Appleby J. Will COVID-19 vaccines be cost effective - And does it matter? The BMJ. 2020;371.                                                                                                                                                                        | Wrong study design      |
| Appleby J. The public finance cost of COVID-19. The BMJ. 2022;376.                                                                                                                                                                                                  | Wrong study design      |
| Araja D, Berkis U, Lunga A, Murovska M. PMU29 Burden of COVID-19 Consequences: an Example of Post-viral Chronic Fatigue Syndrome. Value in Health. 2021;24:S149-S50.                                                                                                | Not Economic evaluation |
| Asukai Y, Briggs A, Garrison LP, Geisler BP, Neumann PJ, Ollendorf DA. Principles of Economic Evaluation in a Pandemic Setting: An Expert Panel Discussion on Value Assessment During the Coronavirus Disease 2019 Pandemic. Pharmacoeconomics. 2021;39(11):1201-8. | Wrong Intervention      |
| Bartsch SM, O'Shea KJ, Chin KL, Strych U, Ferguson MC, Bottazzi ME, et al. Maintaining face mask use before and after achieving different COVID-19 vaccination coverage levels: a modelling study. The Lancet Public Health. 2022;7(4):e356-e65.                    | Wrong Intervention      |
| Basile M, Di Brino E, Rumi F, Cicchetti A. The Cost-Effectiveness Of The Anti-COVID Vaccination Campaign In The Italian Healthcare Setting. International Journal of Technology Assessment in Health Care. 2022;38:S68.                                             | Wrong Population        |
| Beck E, Biundo E, Devlin N, Doherty TM, Garcia-Ruiz AJ, Postma M, et al. Capturing the value of vaccination within health technology assessment and health economics: Literature review and novel conceptual framework. Vaccine. 2022;40(30):4008-16.               | Not Economic evaluation |
| Benest J, Rhodes S, Quaife M, Evans TG, White RG. Optimising vaccine dose in inoculation against SARS-CoV-2, a multi-factor optimisation modelling study to maximise vaccine safety and efficacy. Vaccines. 2021;9(2):1-15.                                         | Not Economic evaluation |
| Benner J, Adair N, Friedman M, Menzin J, Sussman M. PIN153 Lessons Learned from Economic Models of Influenza Vaccines and Applications to SARS-CoV-2. Value in Health. 2020;23:S569.                                                                                | Wrong Population        |
| Berry DA, Berry S, Hale P, Isakov L, Lo AW, Siah KW, et al. A cost/benefit analysis of clinical trial designs for COVID-19 vaccine candidates. PLoS ONE. 2021;15(12).                                                                                               | Wrong Population        |

|                                                                                                                                                                                                                                                                                     |                         |
|-------------------------------------------------------------------------------------------------------------------------------------------------------------------------------------------------------------------------------------------------------------------------------------|-------------------------|
| Blank C. Pharmacists Central to Distributing Pediatric COVID-19 Vaccines. <i>Drug Topics</i> . 2022;166(1):10-1.                                                                                                                                                                    | Wrong Publication text  |
| Bloom DE, Cadarette D, Ferranna M. The Societal Value of Vaccination in the Age of COVID-19. <i>American Journal of Public Health</i> . 2021;111(6):1049-54.                                                                                                                        | Not Economic evaluation |
| Boersma C, Postma MJ. Health Economics of Vaccines: From Current Practice to Future Perspectives. <i>Value in Health</i> . 2021;24(1):1-2.                                                                                                                                          | Not Economic evaluation |
| Bollyky TJ, Murray CJL, Reiner RC. Epidemiology, not geopolitics, should guide COVID-19 vaccine donations. <i>The Lancet</i> . 2021;398(10295):97-9.                                                                                                                                | Not Economic evaluation |
| Bortz RH, Florez C, Laudermilch E, Wirchnianski AS, Lasso G, Malonis RJ, et al. Single-Dilution COVID-19 Antibody Test with Qualitative and Quantitative Readouts. <i>mSphere</i> . 2021;6(2):201-2.                                                                                | Not Economic evaluation |
| Bowie C, Friston K. A 12-month projection to September 2022 of the COVID-19 epidemic in the UK using a dynamic causal model. <i>Front</i> . 2022;10:999210.                                                                                                                         | Not Economic evaluation |
| Braga LM, da Motta OJR, Gomes AP, Oliveira PC, Vicari MV, Siqueira-Batista R. SARS-CoV-2 transmission by aerosols: An underestimated question? <i>Revista da Associacao Medica Brasileira</i> . 2021;67:5-7.                                                                        | Wrong Intervention      |
| Brassel S, Neri M, Steuten L. PIN62 Recognising the broader value of vaccines in HTA: ready for prime time? <i>Value in Health</i> . 2021;24:S117.                                                                                                                                  | Not Economic evaluation |
| Brophy JM. SARS-CoV-2 testing in travellers: Can we be smarter? <i>CMAJ</i> . 2022;194(1):E20.                                                                                                                                                                                      | Wrong Intervention      |
| Cadeddu C, Ricciardi W. The role of HTA in COVID-19 vaccination campaign: the Italian experience...14th European Public Health Conference (Virtual), Public health futures in a changing world, November 10-12, 2021. <i>European Journal of Public Health</i> . 2021;31:iii76-iii. | Not Economic evaluation |

|                                                                                                                                                                                                                                                                                             |                         |
|---------------------------------------------------------------------------------------------------------------------------------------------------------------------------------------------------------------------------------------------------------------------------------------------|-------------------------|
| Campos-Mercade P, Meier AN, Schneider FH, Meier S, Pope D, Wengström E. Monetary incentives increase COVID-19 vaccinations. <i>Science</i> . 2021;374(6569):879-82.                                                                                                                         | Not Economic evaluation |
| Chang AY, Aaby P, Avidan MS, Benn CS, Bertozzi SM, Blatt L, et al. One vaccine to counter many diseases? Modelling the economics of oral polio vaccine against child mortality and COVID-19. 2022.                                                                                          | Wrong Population        |
| Chhatwal J, Postma MJ. Health Economics of Interventions to Tackle the Coronavirus 2019 Pandemic. <i>Value in Health</i> . 2021;24(5):605-6.                                                                                                                                                | Not Economic evaluation |
| Chua BWB, Huynh VA, Lou J, Goh FT, Clapham H, Teerawattananon Y, et al. Protocol for the economic evaluation of COVID-19 pandemic response policies. <i>BMJ Open</i> . 2021;11(9).                                                                                                          | Wrong Country           |
| Chumakov K, Avidan MS, Benn CS, Bertozzi SM, Blatt L, Chang AY, et al. Old vaccines for new infections: Exploiting innate immunity to control COVID-19 and prevent future pandemics. <i>Proceedings of the National Academy of Sciences of the United States of America</i> . 2021;118(21). | Not Economic evaluation |
| Darden ME, Dowdy D, Gardner L, Hamilton BH, Kopecky K, Marx M, et al. Modeling to inform economy-wide pandemic policy: Bringing epidemiologists and economists together. <i>Health Economics (United Kingdom)</i> . 2022;31(7):1291-5.                                                      | Not Economic evaluation |
| DeGruttola V, Goyal R, Martin NK, Wang R. Network methods and design of randomized trials: Application to investigation of COVID-19 vaccination boosters. <i>Clinical Trials</i> . 2022;19(4):363-74.                                                                                       | Not Economic evaluation |
| Dobie T, Zirlinger M. Welcome all. <i>Neuron</i> . 2021;109(19):3013-4.                                                                                                                                                                                                                     | Wrong Publication text  |
| Donaldson C, Biosca O. COVID-19: An economic perspective on vaccinating the world. <i>The BMJ</i> . 2021;373.                                                                                                                                                                               | Not Economic evaluation |
| Dunn R, Caruana DL, Dhuper S, Szema AM. Cost-Benefit Analysis of a Private COVID-19 Vaccination Center. <i>American Journal of Respiratory and Critical Care Medicine</i> . 2022;205(1).                                                                                                    | Wrong Population        |

|                                                                                                                                                                                                                                                                                                                |                         |
|----------------------------------------------------------------------------------------------------------------------------------------------------------------------------------------------------------------------------------------------------------------------------------------------------------------|-------------------------|
| Elvidge J, Dawoud D. Assessing Technologies for COVID-19: What are the Challenges for Health Technology Assessment Agencies? Findings From a Survey and Roundtable Workshop. <i>PharmacoEconomics</i> . 2021;39(12):1455-63.                                                                                   | Not Economic evaluation |
| Emanuel EJ, Osterholm M, Gounder CR. A National Strategy for the "new Normal" of Life with COVID. <i>JAMA</i> . 2022;327(3):211-2.                                                                                                                                                                             | Not Economic evaluation |
| Engebretsen S, Palomares ADL, Rø G, Kristoffersen AB, Lindstrøm JC, Engø-Monsen K, et al. A real-time regional model for COVID-19: Probabilistic situational awareness and forecasting. <i>PLoS Computational Biology</i> . 2023;19(1).                                                                        | Not Economic evaluation |
| epitte S, Alleman T, Nopens I, Baetens J, Coenen S, De Smedt D. Cost-Effectiveness of COVID-19 Policy Measures: A Systematic Review. <i>Value in Health</i> . 2021;24(11):1551-69.                                                                                                                             | Wrong Intervention      |
| ey D, Garg PK. Do we need evidence for evidence-based medicine? <i>Journal of Evaluation in Clinical Practice</i> . 2022;28(5):731-2.                                                                                                                                                                          | Not Economic evaluation |
| Fabiani M, Mateo-Urdiales A, Sacco C, Rota MC, Petrone D, Bressi M, et al. Relative effectiveness of a 2nd booster dose of COVID-19 mRNA vaccine up to four months post administration in individuals aged 80 years or more in Italy: A retrospective matched cohort study. <i>Vaccine</i> . 2023;41(1):76-84. | Not Economic evaluation |
| Far, a D, Alberti T. Modeling the second wave of COVID-19 infections in France and Italy via a stochastic SEIR model. <i>Chaos (Woodbury, NY)</i> . 2020;30(11):111101.                                                                                                                                        | Not Economic evaluation |
| Ferreira LS, Canton O, da Silva RLP, Poloni S, Sudbrack V, Borges ME, et al. Assessing the best time interval between doses in a two-dose vaccination regimen to reduce the number of deaths in an ongoing epidemic of SARS-CoV-2. <i>PLoS Computational Biology</i> . 2022;18(3).                             | Not Economic evaluation |
| Fox N, Adams P, Grainger D, Herz J, Austin C. The Value of Vaccines: A Tale of Two Parts. <i>Vaccines</i> . 2022;10(12).                                                                                                                                                                                       | Not Economic evaluation |
| Gibson S, Saunders R, Stasko N, Bickerstaff CB, Oakley J, Osterman M, et al. Economic and clinical impact of a novel, light-based, at-home antiviral treatment on mild-to-moderate COVID-19. <i>Journal of Medical Economics</i> . 2022;25(1):503-14.                                                          | Wrong Intervention      |

|                                                                                                                                                                                                                                                                                |                         |
|--------------------------------------------------------------------------------------------------------------------------------------------------------------------------------------------------------------------------------------------------------------------------------|-------------------------|
| Giubilini A, Savulescu J, Wilkinson D. Queue questions: Ethics of COVID-19 vaccine prioritization. <i>Bioethics</i> . 2021;35(4):348-55.                                                                                                                                       | Not Economic evaluation |
| Golladay GJ. New World Order. <i>Arthroplasty Today</i> . 2021;7:242.                                                                                                                                                                                                          | Not Economic evaluation |
| Götz G, Herold D, Klotz PA, Schäfer JT. Efficiency in COVID-19 vaccination campaigns—a comparison across germany’s federal states. <i>Vaccines</i> . 2021;9(7).                                                                                                                | Not Economic evaluation |
| Greaves F, Boysen M. NICE's approach to measuring value. <i>The BMJ</i> . 2021;372.                                                                                                                                                                                            | Not Economic evaluation |
| Green RJ, Mustafa F. Guest editorial. <i>Current Allergy and Clinical Immunology</i> . 2020;33(3):128.                                                                                                                                                                         | Not Economic evaluation |
| Griesenbach U, Yáñez-Muñoz RJ. The British Society for Gene and Cell Therapy. <i>Human Gene Therapy</i> . 2021;32(19):983-5.                                                                                                                                                   | Not Economic evaluation |
| Guan WJ, Zhong NS. Reply. <i>Respirology</i> . 2020;25(8):899.                                                                                                                                                                                                                 | Not Economic evaluation |
| Gupta A, Kunte R, Goyal N, Ray S, Singh K. A comparative analysis of control measures on-board ship against COVID-19 and similar novel viral respiratory disease outbreak: Quarantine ship or disembark suspects? <i>Medical Journal Armed Forces India</i> . 2021;77:S430-S6. | Not Economic evaluation |
| Gutierrez D, Sinskey A, Springs S. Models to inform neutralizing antibody therapy strategies during pandemics: The case of SARS-CoV-2. <i>Antibody Therapeutics</i> . 2021;4(1):60-71.                                                                                         | Wrong Intervention      |
| Hageman JR, Alkureishi LA. The status of the COVID-19 vaccines for children age 5 to 11 years. <i>Pediatric Annals</i> . 2021;50(11):e444-e5.                                                                                                                                  | Not Economic evaluation |



|                                                                                                                                                                                                                                                                      |                         |
|----------------------------------------------------------------------------------------------------------------------------------------------------------------------------------------------------------------------------------------------------------------------|-------------------------|
| Hagens A, İnkaya AÇ, Yildirak K, Sancar M, van der Schans J, Acar Sancar A, et al. COVID-19 vaccination scenarios: A cost-effectiveness analysis for turkey. <i>Vaccines</i> . 2021;9(4).                                                                            | Wrong Country           |
| Hodes S, Kovacevic L. Primary care networks: Where are we? Where is the evidence base? What might the future bring? <i>The BMJ</i> . 2021;375.                                                                                                                       | Not Economic evaluation |
| Hodes S, Stanley S, Majeed A. A national vaccination service for the NHS in England: A proposal to be considered with caution. <i>The BMJ</i> . 2022;376.                                                                                                            | Not Economic evaluation |
| Hudson R, Clark-Wright J, Saunders E, Akhtar T, Carroll S. PNS142 What Difference Would a Wider Definition of Prevention Make to Decisions Reached By the Joint Committee on Vaccination and Immunisation (JCVI)? <i>Value in Health</i> . 2020;23:S664.             | Wrong Population        |
| Ibrahim D, Kis Z, Tak K, Papathanasiou MM, Kontoravdi C, Chachuat B, et al. Model-based planning and delivery of mass vaccination campaigns against infectious disease: Application to the COVID-19 pandemic in the UK. <i>Vaccines</i> . 2021;9(12).                | Not Economic evaluation |
| Jahn B, Sroczynski G, Bicher M, Rippinger C, Mühlberger N, Santamaria J, et al. POSA172 How to Optimize COVID-19 Vaccination Considering Limited Vaccination Capacities: A Decision-Analytic Framework and Modeling Study. <i>Value in Health</i> . 2022;25(1):S121. | Not Economic evaluation |
| Jour A. Was EU's COVID-19 vaccine procurement strategy irrational? A re-analysis based on cost-effectiveness considerations. <i>BMC health services research</i> . 2022;22(1):1410.                                                                                  | Wrong Population        |
| Jour A. Cost-effectiveness of future lockdown policies against the COVID-19 pandemic. <i>Health Services Management Research</i> . 2022.                                                                                                                             | Wrong Intervention      |
| Juneau CE, Pueyo T, Bell M, Gee G, Collazzo P, Potvin L. Lessons from past pandemics: a systematic review of evidence-based, cost-effective interventions to suppress COVID-19. <i>Systematic Reviews</i> . 2022;11(1).                                              | Not Economic evaluation |
| Kabir M, Saqib MAN, Zaid M, Ahmed H, Afzal MS. COVID-19, economic impact and child mortality: A global concern. <i>Clinical Nutrition</i> . 2020;39(7):2322-3.                                                                                                       | Not Economic evaluation |

|                                                                                                                                                                                                                                                               |                         |
|---------------------------------------------------------------------------------------------------------------------------------------------------------------------------------------------------------------------------------------------------------------|-------------------------|
| Kane MMD. Effects of the COVID-19 Pandemic on Well-Child Care and Recommendations for Remediation. <i>Pediatric Annals</i> . 2021;50(12):e488-e93.                                                                                                            | Not Economic evaluation |
| Kaufman J, Bagot KL, Hoq M, Leask J, Seale H, Biezen R, et al. Factors influencing Australian healthcare workers' COVID-19 vaccine intentions across settings: A cross-sectional survey. <i>Vaccines</i> . 2022;10(1).                                        | Not Economic evaluation |
| Kelly SL, Le Rutte EA, Richter M, Penny MA, Shattock AJ. COVID-19 vaccine booster strategies in light of emerging viral variants: Frequency, timing, and target groups. 2022.                                                                                 | Not Economic evaluation |
| Khatami SN, Gopalappa C. Deep reinforcement learning framework for controlling infectious disease outbreaks in the context of multi-jurisdictions. 2022.                                                                                                      | Wrong Intervention      |
| Kohns Vasconcelos M, Marazia C, Koniordou M, Fangerau H, Drexler I, Afum-Adjei Awuah A. A conceptual approach to the rationale for SARS-CoV-2 vaccine allocation prioritisation. <i>Pathogens and Global Health</i> . 2021;115(5):273-6.                      | Not Economic evaluation |
| Korkmaz E, Balmert SC, Carey CD, Erdos G, Falo LD. Emerging skin-targeted drug delivery strategies to engineer immunity: A focus on infectious diseases. <i>Expert Opinion on Drug Delivery</i> . 2021;18(2):151-67.                                          | Not Economic evaluation |
| Kostoff RN, Calina D, uc D, Briggs MB, Vlachoyiannopoulos P, Svistunov AA, et al. Why are we vaccinating children against COVID-19? <i>Toxicology Reports</i> . 2021;8:1665-84.                                                                               | Not Economic evaluation |
| Kulcar V, Straganz C, Kreh A, Siller H, File N, Canazei M, et al. University students' adherence and vaccination attitudes during the COVID-19 pandemic: Focusing on costs and benefits. <i>Applied Psychology Health and Well-being</i> . 2022;14(2):572-90. | Not Economic evaluation |
| Kyrychko YN, Blyuss KB, Brovchenko I. Mathematical modelling of the dynamics and containment of COVID-19 in Ukraine. <i>Sci</i> . 2020;10(1):19662.                                                                                                           | Wrong Intervention      |
| Lau JWY. Editor's Perspective September 2022. <i>International Journal of Surgery</i> . 2022;105.                                                                                                                                                             | Not Economic evaluation |

|                                                                                                                                                                                                                                                                                                                                                                         |                         |
|-------------------------------------------------------------------------------------------------------------------------------------------------------------------------------------------------------------------------------------------------------------------------------------------------------------------------------------------------------------------------|-------------------------|
| Lee BE, Sikora C, Faulder D, Risling E, Little LA, Qiu Y, et al. Early warning and rapid public health response to prevent COVID-19 outbreaks in long-term care facilities (LTCF) by monitoring SARS-CoV-2 RNA in LTCF site-specific sewage samples and assessment of antibodies response in this population: Prospective study protocol. <i>BMJ Open</i> . 2021;11(8). | Not Economic evaluation |
| Leong S, Eom K, Ishii K, Aichberger MC, Fetz K, Müller TS, et al. Individual costs and community benefits: Collectivism and individuals' compliance with public health interventions. <i>PLoS ONE</i> . 2022;17(11).                                                                                                                                                    | Not Economic evaluation |
| Lewis D. What scientists have learnt from COVID lockdowns. <i>Nature</i> . 2022;609(7926):236-9.                                                                                                                                                                                                                                                                        | Not Economic evaluation |
| Liu Y, mann FG, Barnard RC, Pearson CAB, Group CC-W, Pastore R, et al. Optimising health and economic impacts of COVID-19 vaccine prioritisation strategies in the WHO European Region. <i>MedRxiv : the Preprint Server for Health Sciences</i> . 2021;14:14.                                                                                                          | Not Economic evaluation |
| López F, Català M, Prats C, Estrada O, Oliva I, Prat N, et al. A Cost-Benefit Analysis of COVID-19 Vaccination in Catalonia. <i>Vaccines</i> . 2022;10(1).                                                                                                                                                                                                              | Wrong Population        |
| Lorgelly PK, Adler A. Impact of a Global Pandemic on Health Technology Assessment. <i>Applied Health Economics and Health Policy</i> . 2020;18(3):339-43.                                                                                                                                                                                                               | Not Economic evaluation |
| Luyten J, Kessels R. Stability of Stated Preferences: Vaccine Priority Setting before and during the First COVID-19 Lockdown. <i>Medical decision making : an international journal of the Society for Medical Decision Making</i> . 2023:272989X221150185.                                                                                                             | Not Economic evaluation |
| MacIntyre CR. Navigating post-vaccine COVID-19 futures in the health and economic context. <i>The Lancet Infectious Diseases</i> . 2021;21(7):893-4.                                                                                                                                                                                                                    | Not Economic evaluation |
| Makhoul M, Abu-Hijleh F, Ayoub HH, Seedat S, Chemaitelly H, Abu-Raddad LJ. Modeling the population-level impact of treatment on COVID-19 disease and SARS-CoV-2 transmission. <i>Epidemics</i> . 2022;39.                                                                                                                                                               | Wrong Intervention      |
| Makhoul M, Ayoub HH, Chemaitelly H, Seedat S, Mumtaz GR, Al-Omari S, et al. Epidemiological impact of sars-cov-2 vaccination: Mathematical modeling analyses. <i>Vaccines</i> . 2020;8(4):1-16.                                                                                                                                                                         | Not Economic evaluation |

|                                                                                                                                                                                                                                                                                                                                                                         |                         |
|-------------------------------------------------------------------------------------------------------------------------------------------------------------------------------------------------------------------------------------------------------------------------------------------------------------------------------------------------------------------------|-------------------------|
| Maltezou HC, Giannouchos TV, Pavli A, Tsonou P, Dedoukou X, Tseroni M, et al. Costs associated with COVID-19 in healthcare personnel in Greece: a cost-of-illness analysis. <i>Journal of Hospital Infection</i> . 2021;114:126-33.                                                                                                                                     | Wrong Population        |
| Mann FG, Davies NG, Vassall A, Edmunds WJ, Jit M, Centre for the Mathematical Modelling of Infectious Diseases C-wg. The potential health and economic value of SARS-CoV-2 vaccination alongside physical distancing in the UK: a transmission model-based future scenario analysis and economic evaluation. <i>The Lancet Infectious Diseases</i> . 2021;21(7):962-74. | Wrong Population        |
| Mar J, Ibarrodo O, Larrañaga I, Aguiar M, Stollenverk N, Bidaurrazaga J, et al. P1 Cost-Utility Analysis of COVID-19 Vaccines in the Basque Country in the First Semester of 2021. <i>Value in Health</i> . 2022;25(12):S1.                                                                                                                                             | Wrong Publication text  |
| Marchetti S, Borin A, Conteduca FP, Iardi G, Guzzetta G, Poletti P, et al. An epidemic model for SARS-CoV-2 with self-adaptive containment measures. <i>PLoS ONE</i> . 2022;17(7).                                                                                                                                                                                      | Not Economic evaluation |
| McBryde ES, Meehan MT, Adegboye OA, Adekunle AI, Caldwell JM, Pak A, et al. Role of modelling in COVID-19 policy development. <i>Paediatric Respiratory Reviews</i> . 2020;35:57-60.                                                                                                                                                                                    | Not Economic evaluation |
| McCarthy CV, O'Mara O, van Leeuwen E, Group CC-W, Jit M, mann F. The impact of COVID-19 vaccination in prisons in England and Wales: a metapopulation model. <i>BMC Public Health</i> . 2022;22(1):1003.                                                                                                                                                                | Not Economic evaluation |
| McWhinnie D, Magalhães C, Philip B. IAAS Statement on the COVID pandemic. <i>Ambulatory Surgery</i> . 2021;27(3):48.                                                                                                                                                                                                                                                    | Wrong Publication text  |
| Meyer RJ. Priority Review Vouchers: GAO Report Provides Scant Evidence of Success. <i>Clinical and Translational Science</i> . 2021;14(1):8-10.                                                                                                                                                                                                                         | Wrong study design      |
| Miles DK, Heald AH, Stedman M. How fast should social restrictions be eased in England as COVID-19 vaccinations are rolled out? <i>International Journal of Clinical Practice</i> . 2021;75(7).                                                                                                                                                                         | Wrong Intervention      |
| Millar MR, Gourtsoyannis Y, Jayakumar A. Ethics of vaccination: Should capability measures be used to inform SARS-CoV-2 vaccination strategies? <i>British Journal of Clinical Pharmacology</i> . 2022;88(1):47-55.                                                                                                                                                     | Not Economic evaluation |
| Mintram K, Anagnostou A, Anokye N, Okine E, Groen D, Saha A, et al. CALMS: Modelling the long-term health and economic impact of COVID-19 using agent-based simulation. <i>PLoS ONE</i> . 2022;17(8).                                                                                                                                                                   | Wrong Population        |

|                                                                                                                                                                                                                                                                                                                       |                         |
|-----------------------------------------------------------------------------------------------------------------------------------------------------------------------------------------------------------------------------------------------------------------------------------------------------------------------|-------------------------|
| Minzenberg MJ, Yoon JH. A profile of high scores on the Peters delusion inventory and low engagement in pandemic-related health behaviors in a non-clinical sample. <i>Schizophrenia Research</i> . 2022;250:10-2.                                                                                                    | Not Economic evaluation |
| Moore S, Hill EM, Dyson L, Tildesley MJ, Keeling MJ. Modelling optimal vaccination strategy for SARS-CoV-2 in the UK. <i>PLoS Computational Biology</i> . 2021;17(5):e1008849.                                                                                                                                        | Not Economic evaluation |
| Moy N, Dulleck U, Shah A, Messmann H, Thrift AP, Talley NJ, et al. Risk-based decision-making related to preprocedural coronavirus disease 2019 testing in the setting of GI endoscopy: management of risks, evidence, and behavioral health economics. <i>Gastrointestinal Endoscopy</i> . 2022;96(5):735-42.e3.     | Not Economic evaluation |
| Mungmunpantipantip R, Wiwanitkit V. Expected cost effectiveness of the fourth dose of COVID-19 vaccine against the omicron variant of COVID-19: a preliminary report. <i>International Journal of Physiology, Pathophysiology and Pharmacology</i> . 2022;14(4):272-5.                                                | Wrong Population        |
| Nana-Kyere S, Seidu B. A Mathematical Evaluation of the Cost-Effectiveness of Self-Protection, Vaccination, and Disinfectant Spraying for COVID-19 Control. <i>Genetics Research</i> . 2022;2022.                                                                                                                     | Wrong Population        |
| Naveel T, Chunda R. The Reported Side Effects of Corona Virus Vaccination among Oral Health Care Workers. <i>Pakistan Journal of Medical and Health Sciences</i> . 2022;16(3):546-51.                                                                                                                                 | Not Economic evaluation |
| Neumann PJ, Cohen JT, Kim DD, Ollendorf DA. Consideration of value-based pricing for treatments and vaccines is important, even in the COVID-19 pandemic. <i>Health Affairs</i> . 2021;40(1):53-61.                                                                                                                   | Not Economic evaluation |
| Nurchis MC, Lontano A, Pascucci D, Sapienza M, Marziali E, Castrini F, et al. COVID-19 Vaccination Campaign among the Health Workers of Fondazione Policlinico Universitario Agostino Gemelli IRCCS: A Cost–Benefit Analysis. <i>International Journal of Environmental Research and Public Health</i> . 2022;19(13). | Wrong Population        |
| Padula W, Malaviya S, Reid N, Chingcuanco F, Ballreich J, Tierce J, et al. PIN150 Economic VALUE of Treatment and Vaccine Technologies to Address the COVID-19 Pandemic: A Cost-Effectiveness and Budget IMPACT Analysis. <i>Value in Health</i> . 2020;23:S568.                                                      | Wrong Country           |
| Paganini I, Sani C, Chilleri C, Baccini M, Antonelli A, Bisanzi S, et al. Assessment of the feasibility of pool testing for SARS-CoV-2 infection screening. <i>Infectious Diseases</i> . 2022;54(7):478-87.                                                                                                           | Not Economic evaluation |

|                                                                                                                                                                                                                                                                                      |                         |
|--------------------------------------------------------------------------------------------------------------------------------------------------------------------------------------------------------------------------------------------------------------------------------------|-------------------------|
| Persad G, ya A. A Comprehensive COVID-19 Response - The Need for Economic Evaluation. <i>New England Journal of Medicine</i> . 2022;386(26):2449-51.                                                                                                                                 | Not Economic evaluation |
| Persson U, Olofsson S, Althin R, Palmberg A, Dorange AC. Acceptance and application of a broad population health perspective when evaluating vaccine. <i>Vaccine</i> . 2022;40(24):3395-401.                                                                                         | Wrong Population        |
| Pham TM, Westerhof I, Bootsma MCJ, Kretzschmar ME, Rozhnova G, Bruijning-Verhagen P. Seasonal patterns of SARS-CoV-2 transmission in secondary schools: a modelling study. 2022.                                                                                                     | Not Economic evaluation |
| Phuong PT, Ha PN. Letter from Vietnam. <i>Respirology</i> . 2023;28(2):192-3.                                                                                                                                                                                                        | Not Economic evaluation |
| Pitman R, Khurana P. EE540 Cost-Effectiveness of Vaccines Targeting Infectious Diseases - Has COVID-19 Changed the Landscape? <i>Value in Health</i> . 2022;25(12):S162.                                                                                                             | Not Economic evaluation |
| Plans-Rubió P. The Cost Effectiveness of Stockpiling Drugs, Vaccines and Other Health Resources for Pandemic Preparedness. <i>PharmacoEconomics - Open</i> . 2020;4(3):393-5.                                                                                                        | Wrong Intervention      |
| Podolsky MI, Present I, Neumann PJ, Kim DD. A Systematic Review of Economic Evaluations of COVID-19 Interventions: Considerations of Non-Health Impacts and Distributional Issues. <i>Value in Health</i> . 2022;25(8):1298-306.                                                     | Wrong study design      |
| Postma M, Boersma C, Hagens A, van der Schans J. The Evolving HTAi Statement on COVID-19 Vaccines...14th European Public Health Conference (Virtual), Public health futures in a changing world, November 10-12, 2021. <i>European Journal of Public Health</i> . 2021;31:iii75-iii. | Wrong Publication text  |
| Postma MJ, Chhatwal J. COVID-19 Health Economics: Looking Back and Scoping the Future. <i>Value in Health</i> . 2022;25(5):695-6.                                                                                                                                                    | Not Economic evaluation |
| Razai MS, Oakeshott P, Esmail A, Wiysonge CS, Viswanath K, Mills MC. COVID-19 vaccine hesitancy: the five Cs to tackle behavioural and sociodemographic factors. <i>Journal of the Royal Society of Medicine</i> . 2021;114(6):295-8.                                                | Not Economic evaluation |

|                                                                                                                                                                                                                                       |                         |
|---------------------------------------------------------------------------------------------------------------------------------------------------------------------------------------------------------------------------------------|-------------------------|
| Razavi-Shearer D, Blach S, Estes C, Gamkrelidze I, Mooneyhan E, Murphy K, et al. Global hbv cascade of care: The pre-COVID-19 baseline. <i>Hepatology</i> . 2021;74:46A.                                                              | Not Economic evaluation |
| Richards F, Kodjamanova P, Chen X, Li N, Atanasov P, Bennetts L, et al. Economic Burden of COVID-19: A Systematic Review. <i>ClinicoEconomics and Outcomes Research</i> . 2022;14:293-307.                                            | Wrong study design      |
| Rodrigues CMC, Plotkin SA. Impact of Vaccines; Health, Economic and Social Perspectives. <i>Frontiers in Microbiology</i> . 2020;11.                                                                                                  | Wrong Intervention      |
| Rojas P, Epp C, Gozzo L, Geba D, Epstein M, Michel S. HTA66 Outcomes Examined in Clinical Trials of Medicines for COVID-19: A Review of Regulatory Agencies' Websites. <i>Value in Health</i> . 2022;25(7):S515-S6.                   | Not Economic evaluation |
| Rountree C, Prentice G. Segmentation of intentions towards COVID-19 vaccine acceptance through political and health behaviour explanatory models. <i>Irish Journal of Medical Science</i> . 2022;191(5):2369-83.                      | Not Economic evaluation |
| Rumi F, Basile M, Cicchetti A. Cost-effectiveness and budget impact analysis for high dose quadrivalent influenza vaccine in the Italian elderly population. <i>Global and Regional Health Technology Assessment</i> . 2021;8:105-13. | Wrong Intervention      |
| Saadi N, Chi YL, Ghosh S, Eggo RM, McCarthy CV, Quaife M, et al. Models of COVID-19 vaccine prioritisation: a systematic literature search and narrative review. <i>BMC Medicine</i> . 2021;19(1):318.                                | Not Economic evaluation |
| Santos P, Almeida F. Exosome-Based Vaccines: History, Current State, and Clinical Trials. <i>Frontiers in Immunology</i> . 2021;12.                                                                                                   | Not Economic evaluation |
| Savinkina A, Gonsalves G, Ross JS, Paltiel AD. Determining population-level allocation strategies for COVID-19 treatments in the United States using a quantitative framework, a case study using nirmatrelvir/ritonavir. 2022.       | Wrong Intervention      |
| Schulenburg JMG. COVID-19: not the time for health economists? A plea for more proactive health economic involvement. <i>European Journal of Health Economics</i> . 2021;22(7):1001-4.                                                | Not Economic evaluation |

|                                                                                                                                                                                                                                                                                                        |                         |
|--------------------------------------------------------------------------------------------------------------------------------------------------------------------------------------------------------------------------------------------------------------------------------------------------------|-------------------------|
| Schüler L, Calabrese JM, Attinger S. Data driven high resolution modeling and spatial analyses of the COVID-19 pandemic in Germany. PLoS ONE. 2021;16(8).                                                                                                                                              | Not Economic evaluation |
| Shaker M, Abrams EM, Greenhawt M. A Cost-Effectiveness Evaluation of Hospitalizations, Fatalities, and Economic Outcomes Associated with Universal Versus Anaphylaxis Risk-Stratified COVID-19 Vaccination Strategies. The Journal of Allergy & Clinical Immunology in Practice. 2021;9(7):2658-68.e3. | Wrong Population        |
| Shaker M, Mauger D, Fuhlbrigge AL. Value-Based, Cost-Effective Care: The Role of the Allergist-Immunologist. Journal of Allergy and Clinical Immunology: In Practice. 2023;11(1):132-9.                                                                                                                | Wrong Population        |
| Sonabend R, Whittles LK, Imai N, Perez-Guzman PN, Knock ES, Rawson T, et al. Non-pharmaceutical interventions, vaccination, and the SARS-CoV-2 delta variant in England: a mathematical modelling study. Lancet. 2021;398(10313):1825-35.                                                              | Not Economic evaluation |
| Sookaromdee P, Wiwanitkit V. New COVID-19 Vaccines, Its Cost and Shelf Life: A Cost Effectiveness Analysis. Archives of Medical Research. 2021;52(4):453.                                                                                                                                              | Wrong Population        |
| Stevenson M, Metry A, Messenger M. Modelling of hypothetical sars-cov-2 point of care tests for routine testing in residential care homes: Rapid cost-effectiveness analysis. Health Technology Assessment. 2021;25(39):vi-73.                                                                         | Wrong Intervention      |
| Tafuri S, Bianchi FP, Stefanizzi P. The public health and the question of the “best vaccine”. Vaccine. 2022;40(28):3813-4.                                                                                                                                                                             | Not Economic evaluation |
| Tekerek B, Günaltay MM, Ozler G, Turgut M. Determinants of COVID-19 cases and deaths in OECD countries. Journal of Public Health (Germany). 2023.                                                                                                                                                      | Not Economic evaluation |
| The L. Lessons from the NHS for UHC and health security. The Lancet. 2021;397(10288):1859.                                                                                                                                                                                                             | Not Economic evaluation |
| Thompson KM, Badizadegan K. Health economic analyses of secondary vaccine effects: a systematic review and policy insights. Expert Review of Vaccines. 2022;21(3):297-312.                                                                                                                             | Wrong study design      |



|                                                                                                                                                                                                                                                                                                           |                         |
|-----------------------------------------------------------------------------------------------------------------------------------------------------------------------------------------------------------------------------------------------------------------------------------------------------------|-------------------------|
| Tiirinki H, Viita-aho M, Tynkkynen LK, Sovala M, Jormanainen V, Keskimäki I. COVID-19 in Finland: Vaccination strategy as part of the wider governing of the pandemic. <i>Health Policy and Technology</i> . 2022;11(2).                                                                                  | Not Economic evaluation |
| Tomaiuolo R, Restelli U, Faggiano FC, Di Resta C, Al Bitar Nehme S, Giuliani F, et al. Health technology assessment to employ COVID-19 serological tests as companion diagnostics in the vaccination campaign against SARS-CoV-2. <i>Clinical Chemistry and Laboratory Medicine</i> . 2022;60(9):1463-77. | Not Economic evaluation |
| Towse A, Chalkidou K, Firth I, Kettler H, Silverman R. How Should the World Pay for a Coronavirus Disease (COVID-19) Vaccine? <i>Value in Health</i> . 2021;24(5):625-31.                                                                                                                                 | Not Economic evaluation |
| Utami AM, Rendrayani F, Khoiry QA, Noviyanti D, Suwantika AA, Postma MJ, et al. Economic evaluation of COVID-19 vaccination: A systematic review. <i>J</i> . 2023;13:06001.                                                                                                                               | Wrong study design      |
| Van der Pol S, Postma MJ, Boersma C. HPR40 Cost-Effectiveness and Budget Impact of Baloxavir Marboxil in the Netherlands Based on Post-COVID Influenza Season Scenarios. <i>Value in Health</i> . 2022;25(12):S239-S40.                                                                                   | Wrong Population        |
| Vardavas C, Zisis K, Nikitara K, Lagou I, Aslanoglou K, Athanasakis K, et al. The cost of the COVID-19 pandemic vs the cost-effectiveness of mitigation strategies in the EU/UK/EEA and OECD countries: a systematic review. 2022.                                                                        | Wrong study design      |
| Vásquez WF, Trudeau JM, Alicea-Planas J. Immediate and informative feedback during a pandemic: Using stated preference analysis to predict vaccine uptake rates. <i>Health Economics (United Kingdom)</i> . 2021;30(12):3123-37.                                                                          | Wrong study design      |
| Walkowiak MP, Walkowiak D. Am I Paid Well Enough to Be Diagnosed with COVID-19? Determinants of Gender Differences in Infection Detection Rate among Polish Working Age Population. <i>Journal of Personalized Medicine</i> . 2022;12(5).                                                                 | Not Economic evaluation |
| Walkowiak MP, Walkowiak JB, Walkowiak D. COVID-19 passport as a factor determining the success of national vaccination campaigns: Does it work? the case of Lithuania vs. Poland. <i>Vaccines</i> . 2021;9(12).                                                                                           | Not Economic evaluation |
| Wang WC, Fann JCY, Chang RE, Jeng YC, Hsu CY, Chen HH, et al. Economic evaluation for mass vaccination against COVID-19. <i>Journal of the Formosan Medical Association</i> . 2021;120:S95-S105.                                                                                                          | Wrong Population        |

|                                                                                                                                                                                                   |                         |
|---------------------------------------------------------------------------------------------------------------------------------------------------------------------------------------------------|-------------------------|
| Xu FF, Brodsky V. HTA65 Socio-Economic Determinants of Health Status During COVID-19 Pandemic in Hungary. Value in Health. 2022;25(12):S309.                                                      | Not Economic evaluation |
| Yasri S, Wiwanitkit V. New COVID-19 vaccine: What about cost and utility? International Journal of Preventive Medicine. 2022;13(1):42.                                                            | Wrong Population        |
| Yegorov S, Kadyrova I, Negmetzhanov B, Kolesnikova Y, Kolesnichenko S, Korshukov I, et al. Sputnik-V reactogenicity and immunogenicity in the blood and mucosa: A prospective cohort study. 2022. | Not Economic evaluation |
| Yu YC, Song Y. Etiology, clinical features, infection control and therapy of SARS-CoV-2 Omicron variant. Medical Journal of Chinese People's Liberation Army. 2022;47(11):1063-72.                | Wrong Publication text  |
| Zhao J, Fu Y, Han P, Yang L. SA6 A Review of Economic Evaluation on Vaccination and Non-Pharmaceutical Interventions for COVID-19 Prevention and Control. Value in Health. 2022;25(7):S605.       | Not Economic evaluation |
| Zivin JG, ers N. The spread of COVID-19 shows the importance of policy coordination. Proceedings of the National Academy of Sciences of the United States of America. 2020;117(52):32842-4.       | Not Economic evaluation |

### Studies with high risk of bias

Relevant articles but excluded after quality assessment due to high risk of bias.

|                                                                                                                                                                                                         |
|---------------------------------------------------------------------------------------------------------------------------------------------------------------------------------------------------------|
| Study                                                                                                                                                                                                   |
| Pilz S, Ioannidis JPA. Does natural and hybrid immunity obviate the need for frequent vaccine boosters against SARS-CoV-2 in the endemic phase? European Journal of Clinical Investigation. 2023;53(2). |
| Volodymyrovych et al. Pharmaco Economics Analysis of COVID-19 Vaccines in Ukraine. Journal of Pharmaceutical Research International. 2021; 33(32A)                                                      |

### Appendix 3.

#### SBU Checklist applied to the four included studies

##### Checklist for assessing the quality of health economic modelling studies

**Author**  
Pilz S, Ioannidis JPA

**Year**  
2023

**Article number**

**Reviewer, date**  
Tanto, 24-March-2023

|                                                                                                                                     | High | Moderate | Low     | Insufficient   | Comments                                                                                              |
|-------------------------------------------------------------------------------------------------------------------------------------|------|----------|---------|----------------|-------------------------------------------------------------------------------------------------------|
| Assessment of the transferability of the study's economic results (Section 2):                                                      |      |          | Low     |                | The assessment purely based on simulation                                                             |
| Assessment of the study quality with respect to economic aspects (Sections 3 and 4):                                                |      |          | Low     |                | The assessment purely based on simulation                                                             |
| Assessment of the study quality with respect to the effects and side effects of the intervention (assessed by the project experts): |      |          |         | Insufficient   | Lack of clear information regarding the outcome and model projection and no adverse event information |
| <b>1. Study relevance (PICO) in relation to the project research questions</b>                                                      |      |          |         |                |                                                                                                       |
| <i>For the study to be included, these questions must be answered by "yes".</i>                                                     | Yes  | No       | Unclear | Not applicable | Comments                                                                                              |
| a) Is the study population relevant?                                                                                                | Yes  |          |         |                | The population is age-group based, however the data is all model projections only (not RWE)           |

|                                                                                                                                                                     |            |           |                |                       |                                                                                                |
|---------------------------------------------------------------------------------------------------------------------------------------------------------------------|------------|-----------|----------------|-----------------------|------------------------------------------------------------------------------------------------|
| b) Is the intervention relevant?                                                                                                                                    | Yes        |           |                |                       | COVID-19 vaccination, however assumptions are made especially for vaccine efficacy             |
| c) Is the comparator relevant?                                                                                                                                      | Yes        |           |                |                       | Non-vaccinated group is based on projection/model                                              |
| d) Is the outcome measure relevant?                                                                                                                                 | Yes        |           |                |                       | It is NNT                                                                                      |
| <b>2. Transferability of the study's economic results</b>                                                                                                           | <b>Yes</b> | <b>No</b> | <b>Unclear</b> | <b>Not applicable</b> | <b>Comments</b>                                                                                |
| a) Are both costs and effects studied (or are the effects assumed to be equal)?                                                                                     | Yes        |           |                |                       | Effects splitted based on vaccine efficacy percentage, and cost is based on scenario of prices |
| b) Is the intervention implemented in a sector or by an organisation (e.g. hospital care or a local social service office) relevant to the current Swedish context? | Yes        |           |                |                       | Same vaccination strategy, and vaccine type and dosages                                        |
| c) Are the unit costs used in the study relevant to the current Swedish context? [1]                                                                                | Yes        |           |                |                       | It uses US dollar                                                                              |
| d) Do the extent and the type of care or intervention delivered to study participants correspond to what patients/users receive in the current Swedish context?     | Yes        |           |                |                       | Same vaccination strategy, and vaccine type and dosages                                        |
| e) Does the study have a societal perspective?                                                                                                                      |            | No        |                |                       | Only health care perspective                                                                   |
| <b>3. Potential conflicts of interest</b>                                                                                                                           | <b>Yes</b> | <b>No</b> | <b>Unclear</b> | <b>Not applicable</b> | <b>Comments</b>                                                                                |
| a) Is there a low risk that the conflicts of interest declared by the authors may have influenced the study results?                                                |            | No        |                |                       | Stated in the article                                                                          |
| b) Is there a low risk that a sponsor with an economic interest in the outcome may have influenced the study results?                                               |            | No        |                |                       | No external funding is declared                                                                |

|                                                                                                                       |            |           |                |                       |                                                                                                            |
|-----------------------------------------------------------------------------------------------------------------------|------------|-----------|----------------|-----------------------|------------------------------------------------------------------------------------------------------------|
| c) Is there a low risk of conflict of interest from other sources (e.g. the authors have developed the intervention)? |            | No        |                |                       | Not mentioned in the article                                                                               |
| <b>4. Quality of the economic analysis</b>                                                                            | <b>Yes</b> | <b>No</b> | <b>Unclear</b> | <b>Not applicable</b> | <b>Comments</b>                                                                                            |
| <b>4.1 Choice of analysis</b>                                                                                         |            |           |                |                       |                                                                                                            |
| a) Is the type of economic analysis justified in relation to the research questions?                                  | Yes        |           |                |                       | It is straight forward EE assessment, however all based on model/estimation only                           |
| <b>4.2 Model structure</b>                                                                                            | <b>Yes</b> | <b>No</b> | <b>Unclear</b> | <b>Not applicable</b> | <b>Comments</b>                                                                                            |
| a) Is the model structure appropriate for the specific research question and the specific health condition?           |            |           | Unclear        |                       | The calculation is based on IFR, and assumptions/projections                                               |
| b) Is the model structure, including the underlying assumptions, transparent?                                         | Yes        |           |                |                       | The author elaborated clearly in the article, for instance the assumptions that all population is infected |
| c) Is the external validity of the model explored? [2]                                                                |            | No        |                |                       | Not mention in the article if there is any other studies similar to the one in the article                 |
| d) Is the time horizon sufficient to reflect all important differences in costs and effects?                          |            |           | Unclear        |                       | It is not mentioned in the article                                                                         |
| e) Markov models: Is the model cycle length motivated by the research question?                                       |            |           |                | Not applicable        |                                                                                                            |
| <b>4.3 Costs and effects</b>                                                                                          | <b>Yes</b> | <b>No</b> | <b>Unclear</b> | <b>Not applicable</b> | <b>Comments</b>                                                                                            |
| a) Have all relevant outcomes been identified (including side effects)?                                               |            | No        |                |                       | The author considers the COVID-19 impact for death only                                                    |

|                                                                                                                                    |            |           |                |                       |                                                           |
|------------------------------------------------------------------------------------------------------------------------------------|------------|-----------|----------------|-----------------------|-----------------------------------------------------------|
| b) Is the data on treatment effects taken from the best possible sources? [3]                                                      |            | No        |                |                       | It is simulation                                          |
| c) Is the difference in treatment effects, which determines the model outcomes, statistically significant?                         |            |           | Unclear        |                       | It is simulation                                          |
| d) Are appropriate methods used to extrapolate treatment effects over the chosen time horizon? [4]                                 |            |           | Unclear        |                       | It is simulation                                          |
| e) Has the study considered compliance? [5]                                                                                        |            | No        |                |                       | Anti vaccine is not considered                            |
| f) Are the quality-of-life weights from the best possible sources?                                                                 |            | No        |                |                       | It is simulation                                          |
| g) Given the perspective of the analysis, have all relevant costs been identified (including those due to side effects)?           |            | No        |                |                       | No side effect information is included in the article     |
| h) Is the data on resource use (e.g. number of social worker visits, number of hospital care days) from the best possible sources? |            | No        |                |                       | It is simulation                                          |
| i) Are the unit costs from the best possible sources?                                                                              |            | No        |                |                       | It is simulation                                          |
| <b>4.4 Interpretation of results</b>                                                                                               | <b>Yes</b> | <b>No</b> | <b>Unclear</b> | <b>Not applicable</b> | <b>Comments</b>                                           |
| a) Was an incremental analysis of both costs and outcomes conducted (or is it possible to calculate)?                              |            |           | Unclear        |                       | Table 3 (purely simulation)                               |
| b) Are appropriate statistical methods used?                                                                                       |            |           | Unclear        |                       | No clear information on the calculation of the simulation |
| c) Are the conclusions consistent with the reported results?                                                                       | Yes        |           |                |                       | See discussion section                                    |
| <b>4.5 Sensitivity analysis</b>                                                                                                    | <b>Yes</b> | <b>No</b> | <b>Unclear</b> | <b>Not applicable</b> | <b>Comments</b>                                           |
| a) Are all important variables explored in sensitivity analyses? [6]                                                               |            |           |                | Not applicable        | Not conducted                                             |

|                                                                                        |            |           |                |                       |                                           |
|----------------------------------------------------------------------------------------|------------|-----------|----------------|-----------------------|-------------------------------------------|
| b) Is the uncertainty in the result explored using probabilistic sensitivity analysis? |            |           |                | Not applicable        | Not conducted                             |
| c) Is the result insensitive to changes in examined variables? [7]                     |            |           |                | Not applicable        | Not conducted                             |
| <b>4.6 Discounting (for studies with a time horizon exceeding 1 year) [8]</b>          | <b>Yes</b> | <b>No</b> | <b>Unclear</b> | <b>Not applicable</b> | <b>Comments</b>                           |
| a) Are costs discounted appropriately?                                                 |            | No        |                |                       | Simulation does not consider the discount |
| b) Are outcomes discounted appropriately?                                              |            | No        |                |                       | Simulation does not consider the discount |

**Checklist for assessing the quality of health economic modelling studies**

**Author**

**Orlewska K, Wierzba W, Sliwczynski A**

**Year Article number**

**2022**

**Reviewer, date**

Tanto, 28/03/2023

|                                                                                                                                                                   | High       | Moderate  | Low            | Insufficient          | Comments                                                                                                                                                                                                                                            |
|-------------------------------------------------------------------------------------------------------------------------------------------------------------------|------------|-----------|----------------|-----------------------|-----------------------------------------------------------------------------------------------------------------------------------------------------------------------------------------------------------------------------------------------------|
| Assessment of the transferability of the study's economic results (Section 2):                                                                                    |            | Moderate  |                |                       | Similar time period, population structure, type and doses of vaccine given and countries geography (affecting transmission), although must be considered that other measures were not implemented strictly in Sweden (ex. Social restrictions, etc) |
| Assessment of the study quality with respect to economic aspects (Sections 3 and 4):                                                                              | High       |           |                |                       | Clear data and taken from the national registry (official data)                                                                                                                                                                                     |
| Assessment of the study quality with respect to the effects and side effects of the intervention (assessed by the project experts):                               |            | Moderate  |                |                       | Straight to the point with the data and explanation about the calculation, however to re-conduct this in Sweden, full study must be explored                                                                                                        |
| <b>1. Study relevance (PICO) in relation to the project research questions</b><br><i>For the study to be included, these questions must be answered by “yes”.</i> | <b>Yes</b> | <b>No</b> | <b>Unclear</b> | <b>Not applicable</b> | <b>Comments</b>                                                                                                                                                                                                                                     |



|                                                                                                                                                                     |            |           |                |                       |                                                                                                                                                              |
|---------------------------------------------------------------------------------------------------------------------------------------------------------------------|------------|-----------|----------------|-----------------------|--------------------------------------------------------------------------------------------------------------------------------------------------------------|
| a) Is the study population relevant?                                                                                                                                | Yes        |           |                |                       | COVID-19 vaccinated population, based on age-group                                                                                                           |
| b) Is the intervention relevant?                                                                                                                                    | Yes        |           |                |                       | Limited to Pfizer vaccine, which available in Poland during 2021                                                                                             |
| c) Is the comparator relevant?                                                                                                                                      | Yes        |           |                |                       | There is age-group based no vaccinated group                                                                                                                 |
| d) Is the outcome measure relevant?                                                                                                                                 | Yes        |           |                |                       | QALY is used                                                                                                                                                 |
| <b>2. Transferability of the study's economic results</b>                                                                                                           | <b>Yes</b> | <b>No</b> | <b>Unclear</b> | <b>Not applicable</b> | <b>Comments</b>                                                                                                                                              |
| a) Are both costs and effects studied (or are the effects assumed to be equal)?                                                                                     | Yes        |           |                |                       | ICER can be calculated                                                                                                                                       |
| b) Is the intervention implemented in a sector or by an organisation (e.g. hospital care or a local social service office) relevant to the current Swedish context? | Yes        |           |                |                       | It is official program by the government                                                                                                                     |
| c) Are the unit costs used in the study relevant to the current Swedish context? [1]                                                                                | Yes        |           |                |                       | Since the treatment is similar, the result is transferable to Swedish circumstances                                                                          |
| d) Do the extent and the type of care or intervention delivered to study participants correspond to what patients/users receive in the current Swedish context?     | Yes        |           |                |                       | Population in Sweden, mostly receive Pfizer vaccine and minimum 2 dosages                                                                                    |
| e) Does the study have a societal perspective?                                                                                                                      |            | No        |                |                       | Strictly health care perspective, although mentioned in the deiscussion that including societal could potentially increase cost effectiveness of vaccination |

| <b>3. Potential conflicts of interest</b>                                                                             | <b>Yes</b> | <b>No</b> | <b>Unclear</b> | <b>Not applicable</b> | <b>Comments</b>                                                                                                          |
|-----------------------------------------------------------------------------------------------------------------------|------------|-----------|----------------|-----------------------|--------------------------------------------------------------------------------------------------------------------------|
| a) Is there a low risk that the conflicts of interest declared by the authors may have influenced the study results?  |            | No        |                |                       | Stated in the article                                                                                                    |
| b) Is there a low risk that a sponsor with an economic interest in the outcome may have influenced the study results? |            |           | Unclear        |                       | Not mention in the article if there is any sponsor involved                                                              |
| c) Is there a low risk of conflict of interest from other sources (e.g. the authors have developed the intervention)? | Yes        |           |                |                       | One of the author works for Polish's ministry                                                                            |
| <b>4. Quality of the economic analysis</b>                                                                            | <b>Yes</b> | <b>No</b> | <b>Unclear</b> | <b>Not applicable</b> | <b>Comments</b>                                                                                                          |
| <b>4.1 Choice of analysis</b>                                                                                         |            |           |                |                       |                                                                                                                          |
| a) Is the type of economic analysis justified in relation to the research questions?                                  | Yes        |           |                |                       |                                                                                                                          |
| <b>4.2 Model structure</b>                                                                                            | <b>Yes</b> | <b>No</b> | <b>Unclear</b> | <b>Not applicable</b> | <b>Comments</b>                                                                                                          |
| a) Is the model structure appropriate for the specific research question and the specific health condition?           | Yes        |           |                |                       | It considers common pathway of disease and cost related to answer the research question                                  |
| b) Is the model structure, including the underlying assumptions, transparent?                                         | Yes        |           |                |                       | The author elaborated clearly in the article, for instance the assumptions that no re-infection in the calculation/model |
| c) Is the external validity of the model explored? [2]                                                                | Yes        |           |                |                       | It is mentioned in the discussion regarding results from other studies                                                   |
| d) Is the time horizon sufficient to reflect all important differences in costs and effects?                          | Yes        |           |                |                       | Clearly mention in the article the basis for choosing time period                                                        |

|                                                                                                                                    |            |           |                |                       |                                                                                                           |
|------------------------------------------------------------------------------------------------------------------------------------|------------|-----------|----------------|-----------------------|-----------------------------------------------------------------------------------------------------------|
| e) Markov models: Is the model cycle length motivated by the research question?                                                    | Yes        |           |                |                       | The time period is given for each states based on disease progression references                          |
| <b>4.3 Costs and effects</b>                                                                                                       | <b>Yes</b> | <b>No</b> | <b>Unclear</b> | <b>Not applicable</b> | <b>Comments</b>                                                                                           |
| a) Have all relevant outcomes been identified (including side effects)?                                                            | Yes        |           |                |                       | Although it is not calculated, for example long term COVID effect, however it is mentioned in the article |
| b) Is the data on treatment effects taken from the best possible sources? [3]                                                      | Yes        |           |                |                       | Data is taken from the national registry                                                                  |
| c) Is the difference in treatment effects, which determines the model outcomes, statistically significant?                         | Yes        |           |                |                       | It is clear cut for state of disease progression                                                          |
| d) Are appropriate methods used to extrapolate treatment effects over the chosen time horizon? [4]                                 | Yes        |           |                |                       | Over the chosen time period , yes, however the study is cut off for 1 year data only                      |
| e) Has the study considered compliance? [5]                                                                                        |            | No        |                |                       | Anti vaccine is not considered                                                                            |
| f) Are the quality-of-life weights from the best possible sources?                                                                 | Yes        |           |                |                       | Data is taken from the national registry                                                                  |
| g) Given the perspective of the analysis, have all relevant costs been identified (including those due to side effects)?           |            | No        |                |                       | No side effect information is included in the article                                                     |
| h) Is the data on resource use (e.g. number of social worker visits, number of hospital care days) from the best possible sources? | Yes        |           |                |                       | Data is taken from the national registry                                                                  |
| i) Are the unit costs from the best possible sources?                                                                              | Yes        |           |                |                       | Data is taken from the national registry                                                                  |

| <b>4.4 Interpretation of results</b>                                                                  | <b>Yes</b> | <b>No</b> | <b>Unclear</b> | <b>Not applicable</b> | <b>Comments</b>                                                                     |
|-------------------------------------------------------------------------------------------------------|------------|-----------|----------------|-----------------------|-------------------------------------------------------------------------------------|
| a) Was an incremental analysis of both costs and outcomes conducted (or is it possible to calculate)? | Yes        |           |                |                       | Table 2 and table 3                                                                 |
| b) Are appropriate statistical methods used?                                                          | Yes        |           |                |                       | In also includes lower and upper limit, and sensitivity analysis                    |
| c) Are the conclusions consistent with the reported results?                                          | Yes        |           |                |                       |                                                                                     |
| <b>4.5 Sensitivity analysis</b>                                                                       | <b>Yes</b> | <b>No</b> | <b>Unclear</b> | <b>Not applicable</b> | <b>Comments</b>                                                                     |
| a) Are all important variables explored in sensitivity analyses? [6]                                  | Yes        |           |                |                       | Page 1025, variables chosen for the DSA                                             |
| b) Is the uncertainty in the result explored using probabilistic sensitivity analysis?                |            | No        |                |                       | Only DSA                                                                            |
| c) Is the result insensitive to changes in examined variables? [7]                                    |            | No        |                |                       | Table 4, population >80, worst scenario result is the only one under ICER threshold |
| <b>4.6 Discounting (for studies with a time horizon exceeding 1 year) [8]</b>                         | <b>Yes</b> | <b>No</b> | <b>Unclear</b> | <b>Not applicable</b> | <b>Comments</b>                                                                     |
| a) Are costs discounted appropriately?                                                                | Yes        |           |                |                       | No discount on the cost                                                             |
| b) Are outcomes discounted appropriately?                                                             | Yes        |           |                |                       | 3.5% for the health outcome                                                         |

**Checklist for assessing the quality of health economic modelling studies**

**Author**

**Debrabant K, Grønbæk L, Kronborg C.**

**Year Article number**

**2021**

**Reviewer, date**

Tanto, 29-March-2023

|                                                                                                                                     | High       | Moderate  | Low            | Insufficient          | Comments                                                                                                 |
|-------------------------------------------------------------------------------------------------------------------------------------|------------|-----------|----------------|-----------------------|----------------------------------------------------------------------------------------------------------|
| Assessment of the transferability of the study's economic results (Section 2):                                                      | High       |           |                |                       | Geographically near, and also the same health care system as Sweden                                      |
| Assessment of the study quality with respect to economic aspects (Sections 3 and 4):                                                |            | Moderate  |                |                       | Data is clearly provided                                                                                 |
| Assessment of the study quality with respect to the effects and side effects of the intervention (assessed by the project experts): |            | Moderate  |                |                       | Side effect of the intervention is not elaborated, however the data is clear and limitation is explained |
| <b>1. Study relevance (PICO) in relation to the project research questions</b>                                                      |            |           |                |                       |                                                                                                          |
| <i>For the study to be included, these questions must be answered by "yes".</i>                                                     | <b>Yes</b> | <b>No</b> | <b>Unclear</b> | <b>Not applicable</b> | <b>Comments</b>                                                                                          |
| a) Is the study population relevant?                                                                                                | Yes        |           |                |                       | The population is divided by age-group and also by scenario of percentage vaccination coverage           |
| b) Is the intervention relevant?                                                                                                    | Yes        |           |                |                       |                                                                                                          |
| c) Is the comparator relevant?                                                                                                      | Yes        |           |                |                       | Non-vaccinated group, and also other groups in different scenarios                                       |

|                                                                                                                                                                     |            |           |                |                       |                                                                                                                                        |
|---------------------------------------------------------------------------------------------------------------------------------------------------------------------|------------|-----------|----------------|-----------------------|----------------------------------------------------------------------------------------------------------------------------------------|
| d) Is the outcome measure relevant?                                                                                                                                 | Yes        |           |                |                       | QALY is used                                                                                                                           |
| <b>2. Transferability of the study's economic results</b>                                                                                                           | <b>Yes</b> | <b>No</b> | <b>Unclear</b> | <b>Not applicable</b> | <b>Comments</b>                                                                                                                        |
| a) Are both costs and effects studied (or are the effects assumed to be equal)?                                                                                     | Yes        |           |                |                       | From the description in the article, it is stated, outcome is not equal between scenarios                                              |
| b) Is the intervention implemented in a sector or by an organisation (e.g. hospital care or a local social service office) relevant to the current Swedish context? | Yes        |           |                |                       | It is responsibility from the Danish government, same in Sweden, it is handled by government ministry                                  |
| c) Are the unit costs used in the study relevant to the current Swedish context? [1]                                                                                | Yes        |           |                |                       | It uses local currency, conversion to SEK is possible                                                                                  |
| d) Do the extent and the type of care or intervention delivered to study participants correspond to what patients/users receive in the current Swedish context?     | Yes        |           |                |                       | It is similar with Sweden prioritization strategy                                                                                      |
| e) Does the study have a societal perspective?                                                                                                                      | Yes        |           |                |                       | It states as focusing to healthcare perspective, and also there is scenario involving productivity loss (limited societal perspective) |
| <b>3. Potential conflicts of interest</b>                                                                                                                           | <b>Yes</b> | <b>No</b> | <b>Unclear</b> | <b>Not applicable</b> | <b>Comments</b>                                                                                                                        |
| a) Is there a low risk that the conflicts of interest declared by the authors may have influenced the study results?                                                |            | No        |                |                       | Stated in the article                                                                                                                  |
| b) Is there a low risk that a sponsor with an economic interest in the outcome may have influenced the study results?                                               |            | No        |                |                       | Stated in the article                                                                                                                  |

|                                                                                                                       |            |           |                |                       |                                                                                                |
|-----------------------------------------------------------------------------------------------------------------------|------------|-----------|----------------|-----------------------|------------------------------------------------------------------------------------------------|
| c) Is there a low risk of conflict of interest from other sources (e.g. the authors have developed the intervention)? |            | No        |                |                       | Stated in the article                                                                          |
| <b>4. Quality of the economic analysis</b>                                                                            | <b>Yes</b> | <b>No</b> | <b>Unclear</b> | <b>Not applicable</b> | <b>Comments</b>                                                                                |
| <b>4.1 Choice of analysis</b>                                                                                         |            |           |                |                       |                                                                                                |
| a) Is the type of economic analysis justified in relation to the research questions?                                  | Yes        |           |                |                       | The concept is valid                                                                           |
| <b>4.2 Model structure</b>                                                                                            | <b>Yes</b> | <b>No</b> | <b>Unclear</b> | <b>Not applicable</b> | <b>Comments</b>                                                                                |
| a) Is the model structure appropriate for the specific research question and the specific health condition?           | Yes        |           |                |                       | Yes, it follows the disease progression pathways, also includes test + FU visit                |
| b) Is the model structure, including the underlying assumptions, transparent?                                         | Yes        |           |                |                       | It is mentioned in the articles several assumptions                                            |
| c) Is the external validity of the model explored? [2]                                                                | Yes        |           |                |                       | It is mentioned as peer-reviewed, and comparison with similar EE in USA is elaborated          |
| d) Is the time horizon sufficient to reflect all important differences in costs and effects?                          | Yes        |           |                |                       | Based on the data provided, it seems sufficient, although no reason is given why only 6 months |
| e) Markov models: Is the model cycle length motivated by the research question?                                       |            |           |                | Not applicable        |                                                                                                |
| <b>4.3 Costs and effects</b>                                                                                          | <b>Yes</b> | <b>No</b> | <b>Unclear</b> | <b>Not applicable</b> | <b>Comments</b>                                                                                |

|                                                                                                                                    |            |           |                |                       |                                                                                                                        |
|------------------------------------------------------------------------------------------------------------------------------------|------------|-----------|----------------|-----------------------|------------------------------------------------------------------------------------------------------------------------|
| a) Have all relevant outcomes been identified (including side effects)?                                                            |            | No        |                |                       | The authors consider treatment options for COVID-19 infection in the cost analysis, but not AE from vaccination itself |
| b) Is the data on treatment effects taken from the best possible sources? [3]                                                      | Yes        |           |                |                       | Data is taken from the official government registry                                                                    |
| c) Is the difference in treatment effects, which determines the model outcomes, statistically significant?                         | Yes        |           |                |                       | Based on assumption that vaccine is 100% effective                                                                     |
| d) Are appropriate methods used to extrapolate treatment effects over the chosen time horizon? [4]                                 | Yes        |           |                |                       | Information on how to calculate the diagnosis and test required (p. 979)                                               |
| e) Has the study considered compliance? [5]                                                                                        |            | No        |                |                       | Anti vaccine is not considered                                                                                         |
| f) Are the quality-of-life weights from the best possible sources?                                                                 | Yes        |           |                |                       | Data is taken from the official government registry                                                                    |
| g) Given the perspective of the analysis, have all relevant costs been identified (including those due to side effects)?           |            | No        |                |                       | It focuses on health care perspective, but no AE cost is included                                                      |
| h) Is the data on resource use (e.g. number of social worker visits, number of hospital care days) from the best possible sources? | Yes        |           |                |                       | Data is taken from the official government registry                                                                    |
| i) Are the unit costs from the best possible sources?                                                                              | Yes        |           |                |                       | Data is taken from the official government registry                                                                    |
| <b>4.4 Interpretation of results</b>                                                                                               | <b>Yes</b> | <b>No</b> | <b>Unclear</b> | <b>Not applicable</b> | <b>Comments</b>                                                                                                        |
| a) Was an incremental analysis of both costs and outcomes conducted (or is it possible to calculate)?                              | Yes        |           |                |                       | Data is provided                                                                                                       |
| b) Are appropriate statistical methods used?                                                                                       | Yes        |           |                |                       | Figure 4 is the key                                                                                                    |



|                                                                                        |            |           |                |                       |                                                                                                                                                         |
|----------------------------------------------------------------------------------------|------------|-----------|----------------|-----------------------|---------------------------------------------------------------------------------------------------------------------------------------------------------|
| c) Are the conclusions consistent with the reported results?                           | Yes        |           |                |                       | Discussion elaborates the result in detail                                                                                                              |
| <b>4.5 Sensitivity analysis</b>                                                        | <b>Yes</b> | <b>No</b> | <b>Unclear</b> | <b>Not applicable</b> | <b>Comments</b>                                                                                                                                         |
| a) Are all important variables explored in sensitivity analyses? [6]                   | Yes        |           |                |                       | Vaccine prices, vaccine efficacy stands at 100%, no co-morbidity, and productivity loss                                                                 |
| b) Is the uncertainty in the result explored using probabilistic sensitivity analysis? |            |           | Unclear        |                       | It is not mentioned in the article                                                                                                                      |
| c) Is the result insensitive to changes in examined variables? [7]                     |            | No        |                |                       | Productivity loss, and in some degree, vaccine price (300DKK, figure 4B)                                                                                |
| <b>4.6 Discounting (for studies with a time horizon exceeding 1 year) [8]</b>          | <b>Yes</b> | <b>No</b> | <b>Unclear</b> | <b>Not applicable</b> | <b>Comments</b>                                                                                                                                         |
| a) Are costs discounted appropriately?                                                 |            | No        |                |                       | No information for discount of cost                                                                                                                     |
| b) Are outcomes discounted appropriately?                                              | Yes        |           |                |                       | It follows Ministry of Finance, Denmark for recommendation, however it also uses 2%, is there a possibility for this program to extend beyond 35 years? |

**Checklist for assessing the quality of health economic modelling studies**

**Author**

**Volodymyrovych et al.**

**Year Article number**

**2021**

**Reviewer, date**

Tanto, 29-March-2023

|                                                                                                                                     | High | Moderate | Low     | Insufficient   | Comments                                                                                                 |
|-------------------------------------------------------------------------------------------------------------------------------------|------|----------|---------|----------------|----------------------------------------------------------------------------------------------------------|
| Assessment of the transferability of the study's economic results (Section 2):                                                      |      |          | Low     |                | Not enough detail for this study to be replicated                                                        |
| Assessment of the study quality with respect to economic aspects (Sections 3 and 4):                                                |      |          |         | Insufficient   | No essential data is provided to justify the result                                                      |
| Assessment of the study quality with respect to the effects and side effects of the intervention (assessed by the project experts): |      |          | Low     |                | Many loop holes and weakness in the article, question arise for the 'peer-reviewed' status               |
| <b>1. Study relevance (PICO) in relation to the project research questions</b>                                                      |      |          |         |                |                                                                                                          |
| <i>For the study to be included, these questions must be answered by “yes”.</i>                                                     | Yes  | No       | Unclear | Not applicable | Comments                                                                                                 |
| a) Is the study population relevant?                                                                                                | Yes  |          |         |                | The population is divided by age-group and also by scenario of percentage vaccination coverage           |
| b) Is the intervention relevant?                                                                                                    | Yes  |          |         |                | The vaccine stated in the article is Pfizer, however for sensitivity analysis, other brands are included |
| c) Is the comparator relevant?                                                                                                      | Yes  |          |         |                | Non-vaccinated group                                                                                     |
| d) Is the outcome measure relevant?                                                                                                 | Yes  |          |         |                | QALY is used                                                                                             |

| <b>2. Transferability of the study's economic results</b>                                                                                                           | <b>Yes</b> | <b>No</b> | <b>Unclear</b> | <b>Not applicable</b> | <b>Comments</b>                                                                                                             |
|---------------------------------------------------------------------------------------------------------------------------------------------------------------------|------------|-----------|----------------|-----------------------|-----------------------------------------------------------------------------------------------------------------------------|
| a) Are both costs and effects studied (or are the effects assumed to be equal)?                                                                                     | Yes        |           |                |                       | From the description in the article, it is stated, however details are poorly elaborated                                    |
| b) Is the intervention implemented in a sector or by an organisation (e.g. hospital care or a local social service office) relevant to the current Swedish context? | Yes        |           |                |                       | It is responsibility from the Ukraine government, same in Sweden, it is handled by government ministry                      |
| c) Are the unit costs used in the study relevant to the current Swedish context? [1]                                                                                | Yes        |           |                |                       | It uses local currency, conversion to SEK is possible                                                                       |
| d) Do the extent and the type of care or intervention delivered to study participants correspond to what patients/users receive in the current Swedish context?     | Yes        |           |                |                       | It is similar with Sweden prioritization strategy                                                                           |
| e) Does the study have a societal perspective?                                                                                                                      |            |           | Unclear        |                       | It states as focusing to healthcare perspective, but in the same paragraph, it states also relation to societal. Ambiguous. |
| <b>3. Potential conflicts of interest</b>                                                                                                                           | <b>Yes</b> | <b>No</b> | <b>Unclear</b> | <b>Not applicable</b> | <b>Comments</b>                                                                                                             |
| a) Is there a low risk that the conflicts of interest declared by the authors may have influenced the study results?                                                |            | No        |                |                       | Stated in the article                                                                                                       |
| b) Is there a low risk that a sponsor with an economic interest in the outcome may have influenced the study results?                                               |            | No        |                |                       | Stated in the article                                                                                                       |
| c) Is there a low risk of conflict of interest from other sources (e.g. the authors have developed the intervention)?                                               |            | No        |                |                       | Stated in the article                                                                                                       |
| <b>4. Quality of the economic analysis</b>                                                                                                                          | <b>Yes</b> | <b>No</b> | <b>Unclear</b> | <b>Not applicable</b> | <b>Comments</b>                                                                                                             |

| 4.1 Choice of analysis                                                                                      |     |    |         |                |                                                                                                                                                                                          |
|-------------------------------------------------------------------------------------------------------------|-----|----|---------|----------------|------------------------------------------------------------------------------------------------------------------------------------------------------------------------------------------|
| a) Is the type of economic analysis justified in relation to the research questions?                        | Yes |    |         |                | The concept is valid, however the details are poorly elaborated                                                                                                                          |
| 4.2 Model structure                                                                                         | Yes | No | Unclear | Not applicable | Comments                                                                                                                                                                                 |
| a) Is the model structure appropriate for the specific research question and the specific health condition? |     |    | Unclear |                | It is not informative enough to learn the full concept idea. It is definitely not Markov.                                                                                                |
| b) Is the model structure, including the underlying assumptions, transparent?                               |     |    | Unclear |                | It is mentioned in the articles several assumptions, although not all is clear, example: section 2.2.1 regarding decreasing rate for 0-4 years old. What is the basis to lower it to 45? |
| c) Is the external validity of the model explored? [2]                                                      |     |    | Unclear |                | It is mentioned as peer-reviewed, however many contradictive information in the article.                                                                                                 |
| d) Is the time horizon sufficient to reflect all important differences in costs and effects?                |     |    | Unclear |                | Not mention in the article regarding the reason for timeframe (Apr-May 2021)                                                                                                             |
| e) Markov models: Is the model cycle length motivated by the research question?                             |     |    |         | Not applicable |                                                                                                                                                                                          |
| 4.3 Costs and effects                                                                                       | Yes | No | Unclear | Not applicable | Comments                                                                                                                                                                                 |

|                                                                                                                                    |            |           |                |                       |                                                                                                                        |
|------------------------------------------------------------------------------------------------------------------------------------|------------|-----------|----------------|-----------------------|------------------------------------------------------------------------------------------------------------------------|
| a) Have all relevant outcomes been identified (including side effects)?                                                            |            | No        |                |                       | The authors consider treatment options for COVID-19 infection in the cost analysis, but not AE from vaccination itself |
| b) Is the data on treatment effects taken from the best possible sources? [3]                                                      | Yes        |           |                |                       | Data is taken from the official government registry                                                                    |
| c) Is the difference in treatment effects, which determines the model outcomes, statistically significant?                         |            |           | Unclear        |                       | No details for this information, only summary in the article                                                           |
| d) Are appropriate methods used to extrapolate treatment effects over the chosen time horizon? [4]                                 |            |           | Unclear        |                       | No information is provided                                                                                             |
| e) Has the study considered compliance? [5]                                                                                        |            | No        |                |                       | Anti vaccine is not considered                                                                                         |
| f) Are the quality-of-life weights from the best possible sources?                                                                 | Yes        |           |                |                       | Data is taken from the official government registry                                                                    |
| g) Given the perspective of the analysis, have all relevant costs been identified (including those due to side effects)?           |            | No        |                |                       | It focuses on health care perspective, but no AE cost is included                                                      |
| h) Is the data on resource use (e.g. number of social worker visits, number of hospital care days) from the best possible sources? | Yes        |           |                |                       | Data is taken from the official government registry                                                                    |
| i) Are the unit costs from the best possible sources?                                                                              | Yes        |           |                |                       | Data is taken from the official government registry                                                                    |
| <b>4.4 Interpretation of results</b>                                                                                               | <b>Yes</b> | <b>No</b> | <b>Unclear</b> | <b>Not applicable</b> | <b>Comments</b>                                                                                                        |
| a) Was an incremental analysis of both costs and outcomes conducted (or is it possible to calculate)?                              |            | No        |                |                       | No data is provided, example QALy data is not available                                                                |
| b) Are appropriate statistical methods used?                                                                                       |            |           | Unclear        |                       | No information is provided                                                                                             |

|                                                                                        |            |           |                |                       |                                                                                                                                |
|----------------------------------------------------------------------------------------|------------|-----------|----------------|-----------------------|--------------------------------------------------------------------------------------------------------------------------------|
| c) Are the conclusions consistent with the reported results?                           |            |           | Unclear        |                       | Not enough information in the result section to justify discussion section                                                     |
| <b>4.5 Sensitivity analysis</b>                                                        | <b>Yes</b> | <b>No</b> | <b>Unclear</b> | <b>Not applicable</b> | <b>Comments</b>                                                                                                                |
| a) Are all important variables explored in sensitivity analyses? [6]                   |            |           | Unclear        |                       | It is stated in the article, however the calculation is not provided, example: lower-higher limit information is not available |
| b) Is the uncertainty in the result explored using probabilistic sensitivity analysis? |            |           | Unclear        |                       | Sensitivity analysis is mentioned as 'conducted', however no detail data regarding it.                                         |
| c) Is the result insensitive to changes in examined variables? [7]                     |            |           | Unclear        |                       | Sensitivity analysis is mentioned as 'conducted', however no detail data regarding it.                                         |
| <b>4.6 Discounting (for studies with a time horizon exceeding 1 year) [8]</b>          | <b>Yes</b> | <b>No</b> | <b>Unclear</b> | <b>Not applicable</b> | <b>Comments</b>                                                                                                                |
| a) Are costs discounted appropriately?                                                 |            |           | Unclear        |                       | No information for discount of cost                                                                                            |
| b) Are outcomes discounted appropriately?                                              |            |           | Unclear        |                       | Contradictive information between abstract and section 2.4                                                                     |

[1] Provided that they, if necessary, are converted to Swedish krona [SEK], and adjusted to the current price year according to purchasing power parity (PPP). The following cost converter is used: <http://eppi.ioe.ac.uk/costconversion/default.aspx>

[2] External validity involves comparing the outcomes of the model with those from other models or empirical studies. It may also involve having the model peer reviewed. A mere comparison of the study's incremental cost-effectiveness ratio (ICER) with that of other studies is not sufficient for a “yes” answer.

[3] Are there other studies or studies of better quality that contain data on the effects of the intervention that should have been included in the analysis? If there are several high quality studies, are the results synthesized in a meta-analysis?

[4] Are assumptions regarding a sustained treatment effect after the follow-up period clearly presented and discussed?

[5] Has the study considered compliance, possibly supplemented with information on whether analyses were performed according to intention-to-treat (ITT)? Do patients/users and care providers employ the intervention as intended (e.g. the number of sessions in a treatment programme)?

[6] Concerns variables containing uncertainty that may influence the results of the analysis. If extrapolations are made from empirical data, it may be important to explore different methods of extrapolating.

[7] Concerns the robustness of the results, i.e. that the sensitivity analyses do not alter the overall conclusions about cost-effectiveness (regarding both one-way and probabilistic sensitivity analysis).

[8] Is the selected approach justified? Different countries have different recommendations. Future costs should be discounted (but the discount rate may vary). For future outcomes, there are arguments both for and against discounting. In Sweden, the Dental and Pharmaceutical Benefits Agency recommends a discount rate of 3% for both costs and effects, but also requires sensitivity analyses with rates of 0 and 5%.



## Appendix 4

### Data Extraction Table

| General study characteristics        | Orlewska,2022                                                                                      | Debrabant,2021                                                                                                                                                                                                                                                                                                                                                                                                                                                                                  |
|--------------------------------------|----------------------------------------------------------------------------------------------------|-------------------------------------------------------------------------------------------------------------------------------------------------------------------------------------------------------------------------------------------------------------------------------------------------------------------------------------------------------------------------------------------------------------------------------------------------------------------------------------------------|
| First author and year of publication | Orlewska,2022                                                                                      | Debrabant, 2021                                                                                                                                                                                                                                                                                                                                                                                                                                                                                 |
| Sources of funding                   | Not stated                                                                                         | Stated,<br>University of Southern Denmark<br>(employer)                                                                                                                                                                                                                                                                                                                                                                                                                                         |
| Competing interests                  | Stated,<br>There are no conflicts of interests.                                                    | Stated,<br>There are no conflicts of interests.                                                                                                                                                                                                                                                                                                                                                                                                                                                 |
| Setting                              | Poland                                                                                             | Denmark                                                                                                                                                                                                                                                                                                                                                                                                                                                                                         |
| Patient characteristics              | 5 groups: general population in Poland,<br>and based on age-group (30-39, 40-49,<br>60-69 and >80) | Population is based on the two age-<br>groups (18-60 years old and 60 years old<br>and older) and divided into 4 scenarios:<br>1. Vaccination to 25 percent of total<br>Danish population who are 60 years old<br>and older.<br>2. Vaccination to 25 percent of total<br>Danish population who are 18-60 years<br>old.<br>3. Vaccination to 15 percent of total<br>Danish population who are 18-60 years<br>old and 25 percent of total Danish<br>population who are 60 years old and<br>older. |

|                                              |                                                                                                           |                                                                                                                                                                                                                                                                                                                                                                                                                                                                                      |
|----------------------------------------------|-----------------------------------------------------------------------------------------------------------|--------------------------------------------------------------------------------------------------------------------------------------------------------------------------------------------------------------------------------------------------------------------------------------------------------------------------------------------------------------------------------------------------------------------------------------------------------------------------------------|
|                                              |                                                                                                           | 4. Vaccination to 40 percent of total Danish population who are 18-60 years old.                                                                                                                                                                                                                                                                                                                                                                                                     |
| Type of intervention                         | Pfizer Comirnaty vaccine                                                                                  | COVID-19 vaccination with assumption of 95% efficacy (no specific brand is mentioned)                                                                                                                                                                                                                                                                                                                                                                                                |
| Control treatment                            | 5 groups: unvaccinated general population in Poland, and based on age-group (30-39, 40-49, 60-69 and >80) | Control is only one group which is non-vaccinated Danish general population.                                                                                                                                                                                                                                                                                                                                                                                                         |
| Eligibility criteria                         | General population in Poland, and divided by 4 age-group (30-39, 40-49, 60-69 and >80)                    | Danish population who are 18 years old and older.                                                                                                                                                                                                                                                                                                                                                                                                                                    |
| Methods and outcomes of economic evaluations |                                                                                                           |                                                                                                                                                                                                                                                                                                                                                                                                                                                                                      |
| Time frame of the analysis (time horizon)    | 1 year                                                                                                    | 6 months                                                                                                                                                                                                                                                                                                                                                                                                                                                                             |
| If model based                               | Markov                                                                                                    | Dynamic transmission model                                                                                                                                                                                                                                                                                                                                                                                                                                                           |
| Data source of resource use                  | Polish Agency for Health Technology Assessment and Tariff System (AOTMiT)                                 | <ul style="list-style-type: none"> <li>- deleted entry on a social media platform by a European Minister of Health (vaccine's price)</li> <li>- the regional health authorities (vaccine administration cost)</li> <li>- The Danish Health Data Authority (DHDA): hospitalization cost</li> <li>- a telephone survey by Statens Serum Institut: productivity loss</li> <li>- Statistics Denmark: productivity loss</li> <li>- statistics from Eurostat: productivity loss</li> </ul> |

| Assumptions of the measurement of resources           |                                                                                                                                                                                                                                                                                                                                                                        |                                                                                                                                                                                                                                                                          |
|-------------------------------------------------------|------------------------------------------------------------------------------------------------------------------------------------------------------------------------------------------------------------------------------------------------------------------------------------------------------------------------------------------------------------------------|--------------------------------------------------------------------------------------------------------------------------------------------------------------------------------------------------------------------------------------------------------------------------|
| Costs (in reported currency or in converted currency) | Year 2020, in PLN (Polish Zloty).<br>Exchange rate: 1 euro = 4.44 PLN                                                                                                                                                                                                                                                                                                  | Year 2020, in DKK (Danish Krona)<br>Exchange rate: 1 euro = 7.4 DKK                                                                                                                                                                                                      |
| Data source of effects                                | <ul style="list-style-type: none"> <li>- mortality: life years lost with survival age data from Statistics Poland</li> <li>- QALY: questionnaire from other study</li> <li>- vaccine efficacy: Pfizer clinical data</li> </ul>                                                                                                                                         | <ul style="list-style-type: none"> <li>- life-years: administrative data from Statistics Denmark and Staten Serum Institut</li> <li>- QALY: other study (55)</li> <li>- Ministry of Finance Denmark for discount rate</li> </ul>                                         |
| Methods of measurement of effects                     | willingness-to-pay-threshold, which in Poland is $3 \times$ GDP/per capita (147,024 PLN/QALY gained in 2020)                                                                                                                                                                                                                                                           | no specific threshold, instead the result is compared with other preventive programmes in Denmark                                                                                                                                                                        |
| Incremental cost–effectiveness ratios                 | <p>Base case: Vaccination to 60-69 and &gt;80 is cost saving. While cost effective for other age-group and in general population.</p> <p>ICER (PLN/QALY):</p> <ul style="list-style-type: none"> <li>- general population: 6,249</li> <li>- age 30-39: 67,823</li> <li>- age 40-49: 28,135</li> <li>- age 60-69: cost saving</li> <li>- &gt;80: cost saving</li> </ul> | <p>Scenarios 2 and 4 are dominated thus it is no longer included in evaluation.</p> <p>ICER base-case for scenario 1 is between 53,000-118,000 DKK/QALY (vaccine price 300-500 DKK), and scenario 3 is between 319,000-803,000 DKK/QALY (vaccine price 300-500 DKK).</p> |
| Outcome(s) of analyses of sensitivity analyses        | In the general population and in age-group 30-39 ICER is most sensitive to the vaccine effectiveness, vaccine price, and SARS-CoV-2 infection rates.                                                                                                                                                                                                                   | <p>Cost of hospitalisation does not affect ICER, however mortality rate and vaccine efficacy do.</p> <p>Vaccine price and inclusion of productivity loss affect cost effectiveness of the program.</p>                                                                   |

|                             |                                                                                                                                                                      |                                                                                                                                                                                                                                                                                                                                                                                    |
|-----------------------------|----------------------------------------------------------------------------------------------------------------------------------------------------------------------|------------------------------------------------------------------------------------------------------------------------------------------------------------------------------------------------------------------------------------------------------------------------------------------------------------------------------------------------------------------------------------|
| <p>Authors' conclusions</p> | <p>In most scenarios, vaccination to population 60-69 and &gt;80, is cost saving, and in general and to in? all other age-groups, vaccination is cost effective.</p> | <p>Without productivity loss, the elderly population should always be part of the target group for a COVID-19 vaccination programme and compared to other programmes, it is cost effective.</p> <p>Taking productivity loss into account, at least in the case of low vaccine prices (300 DKK), vaccinating the younger population first can be cost effective (key is fig 4).</p> |
|-----------------------------|----------------------------------------------------------------------------------------------------------------------------------------------------------------------|------------------------------------------------------------------------------------------------------------------------------------------------------------------------------------------------------------------------------------------------------------------------------------------------------------------------------------------------------------------------------------|

## Appendix 5

### Calculation of COVID-19 vaccination effect in Sweden based on Orlewska's data

| A                  | B                                                        | C                                                    | D                                            | E                                                                                  | F                        | G                                                                                    | H                                                                | I                                                         | J                                             | K                        |
|--------------------|----------------------------------------------------------|------------------------------------------------------|----------------------------------------------|------------------------------------------------------------------------------------|--------------------------|--------------------------------------------------------------------------------------|------------------------------------------------------------------|-----------------------------------------------------------|-----------------------------------------------|--------------------------|
| Age-group          | Based on Persson, U. et al. (39) – unvaccinated scenario |                                                      |                                              | Number of expected deaths per 1000 individuals' base case (based on Orlewska) (26) |                          | Simulation of the situation in Sweden if COVID-19 vaccination program is implemented |                                                                  |                                                           |                                               | Orlewska data (26)       |
|                    | QALYs lost per premature death                           | Number of deaths based on excess mortality in Sweden | Total QALY-loss due to excess mortality 2020 | No vaccination program                                                             | With vaccination program | Number of deaths based on excess mortality in Sweden (vaccinated)                    | Difference of deaths from vaccinated and non-vaccinated scenario | Total QALY-loss due to excess mortality 2020 (vaccinated) | Gained QALY per avoidable death if vaccinated | Orlewska QALY lost/death |
| 30-39              | 20                                                       | 23                                                   | 455.59                                       | 0.07                                                                               | 0.01                     | 1.85                                                                                 | 21.15                                                            | 37.25                                                     | 19.78                                         | 19.87                    |
| 40-49              | 18                                                       | 54                                                   | 963.27                                       | 0.20                                                                               | 0.02                     | 4.59                                                                                 | 49.41                                                            | 83.12                                                     | 17.81                                         | 17.09                    |
| 60-69              | 12.09                                                    | 494                                                  | 5,882.87                                     | 1.75                                                                               | 0.14                     | 39.24                                                                                | 454.76                                                           | 474.38                                                    | 11.89                                         | 10.43                    |
| >80                | 4.06                                                     | 4,705                                                | 19,089.30                                    | 11.86                                                                              | 0.97                     | 383.62                                                                               | 4,321.38                                                         | 1,556.44                                                  | 4.06                                          | 2.12                     |
| General population | 5.98                                                     | 7,049                                                | 42,159.97                                    | 2.28                                                                               | 0.18                     | 556.50                                                                               | 6,492.50                                                         | 3,328.42                                                  | 5.98                                          | 7.54                     |

### **The explanation for the calculation:**

- Person, U. et al. (39) provided the data of non-vaccinated Swedish population (column B, C, D).
- Orlewska (26) showed the base case expected deaths per 1000 individuals in non-vaccinated (column E) and in vaccinated scenario (column F).
- Number of death based on excess mortality in Sweden (in vaccinated scenario) (Column G) is calculated from column C multiplied with column F and divided by column E. ( $G = (C \times F) / E$ )
- Column H (Difference of death cases from vaccinated and non-vaccinated scenario) is calculated from Number of deaths based on excess mortality in Sweden (column C) subtracted with Number of deaths based on excess mortality in Sweden (vaccinated) (Column G). ( $H = C - G$ )
- Total QALY-loss due to excess mortality 2020 (vaccinated) (Column I) is calculated from QALYs lost per premature death (Column B) multiplied with Number of deaths based on excess mortality in Sweden (vaccinated) (Column G) ( $I = B \times G$ )
- Lost QALY per avoidable death if vaccinated (Column J) is calculated from (Total QALY-loss due to excess mortality 2020 (Column D) - Total QALY-loss due to excess mortality 2020 (vaccinated) (Column I) divided with Difference of death cases from vaccinated and non-vaccinated scenario (Column H). ( $J = (D - I) / H$ ).
